# Supplementary material for: Exploring the microbial metalloproteome using MIRAGE
Source: Royal Society of Chemistry journal article supplement (doi:10.1039/c1mt00154j), 2011-01-01
Supplement: c1mt00154j.pdf [file c1mt00154j.pdf]

## Electronic Supplementary Information

### Exploring the microbial metalloproteome using MIRAGE

Ana-Maria Sevcenco,<sup>a,b</sup> Martijn W. H. Pinkse,<sup>a</sup> Hubert Th. Wolterbeek,<sup>b</sup> Peter D. E. M. Verhaert,<sup>a</sup>  
Wilfred R. Hagen<sup>a</sup> and Peter-Leon Hagedoorn<sup>\*a</sup>

<sup>a</sup>*Department of Biotechnology, Delft University of Technology, Julianalaan 67, 2628 BC Delft, The Netherlands.*

<sup>b</sup>*Department of Radiation, Radionuclides and Reactors, Delft University of Technology, Mekelweg 15, 2629 JB, Delft, The Netherlands*

*\*To whom correspondance should be addressed.*

*E-mail: [p.l.hagedoorn@tudelft.nl](mailto:p.l.hagedoorn@tudelft.nl); Fax: +31 15 2782355; Tel: +31 15 2782334*

**Figure S1.** Autoradiogram of native 2D-PAGE of soluble protein extract of *E. coli*. Extracts were obtained from cells grown in (A) 6  $\mu\text{M}$  Fe and in (B) 40  $\mu\text{M}$  Fe (575  $\mu\text{g}$  protein). The protein identities for the different spots are given in tables S1 and S2.

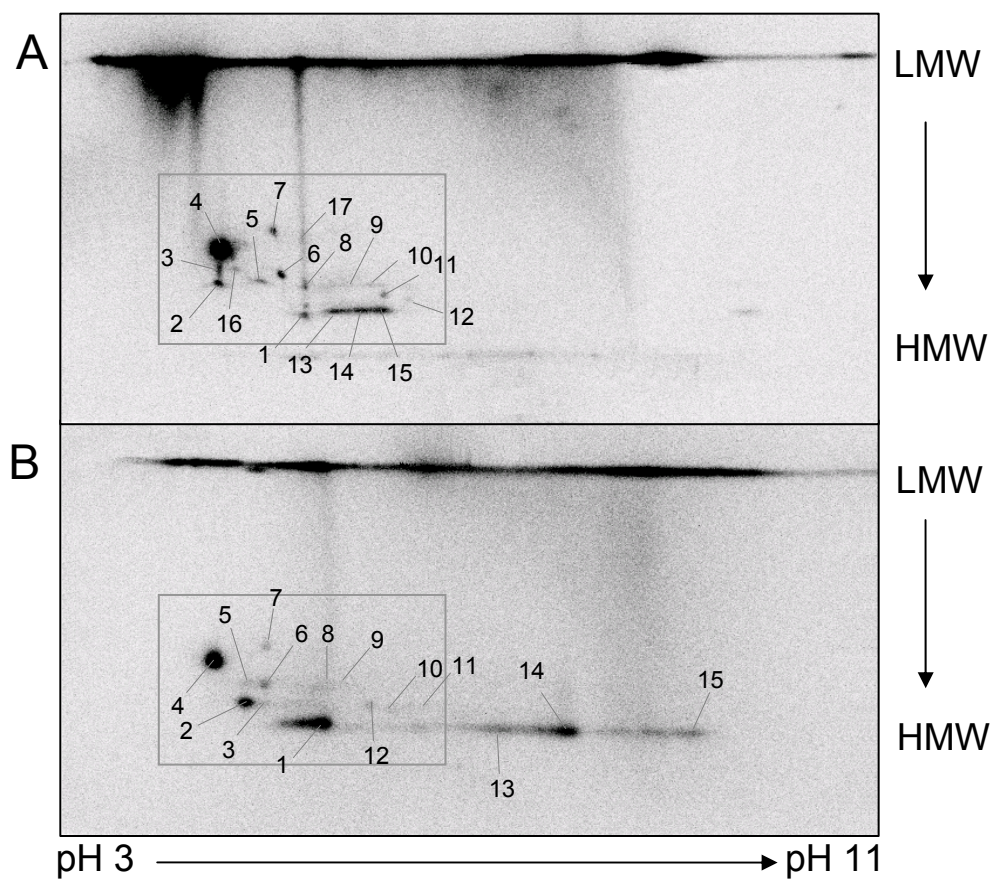

**Table S1** Protein identification by LC MS/MS after native–native 2D–PAGE separation of *E. coli* soluble protein extract obtained from growth in LB medium containing 6  $\mu$ M Fe.

| Spot #      | Gene <sup>a</sup> | Protein                                                                             | Mascot protein score <sup>b</sup>           | emPAI <sup>c</sup> | Unique peptides |           |
|-------------|-------------------|-------------------------------------------------------------------------------------|---------------------------------------------|--------------------|-----------------|-----------|
| <b>1</b>    | <b>Ftn</b>        | <b>Ferritin</b>                                                                     | <b>733</b>                                  | <b>6.31</b>        | <b>9</b>        |           |
|             | NmpC              | Outer membrane porin protein nmpC precursor                                         | 250                                         | 0.56               | 5               |           |
|             | Pgk               | Phosphoglycerate kinase                                                             | 163                                         | 0.30               | 3               |           |
|             | <b>Bfr</b>        | <b>Bacterioferritin</b>                                                             | <b>133</b>                                  | <b>0.76</b>        | <b>3</b>        |           |
|             | YghZ              | Aldo–keto reductase                                                                 | 66                                          | 0.20               | 2               |           |
|             | GlyA              | Serine hydroxymethyltransferase                                                     | 57                                          | 0.17               | 2               |           |
|             | <b>2</b>          | <b>KatE</b>                                                                         | <b>Hydroperoxidase HPII (catalase)</b>      | <b>1 675</b>       | <b>2.64</b>     | <b>22</b> |
| <b>CodA</b> |                   | <b>Cytosine deaminase</b>                                                           | <b>448</b>                                  | <b>0.83</b>        | <b>7</b>        |           |
| NmpC        |                   | Outer membrane porin protein nmpC precursor                                         | 272                                         | 0.56               | 5               |           |
| FliD        |                   | Flagellar filament capping protein                                                  | 218                                         | 0.35               | 4               |           |
| FucU        |                   | Protein of fucose operon                                                            | 204                                         | 1.45               | 3               |           |
| AldA        |                   | Aldehyde dehydrogenase A, NAD–linked                                                | 184                                         | 0.32               | 4               |           |
| FucI        |                   | L–fucose isomerase                                                                  | 129                                         | 0.18               | 3               |           |
| GadB        |                   | Glutamate decarboxylase isozyme                                                     | 106                                         | 0.23               | 3               |           |
| GapA        |                   | Glyceraldehyde–3–phosphate dehydrogenase                                            | 88                                          | 0.35               | 3               |           |
| OmpC        |                   | Outer membrane porin protein C                                                      | 72                                          | 0.19               | 2               |           |
| <b>3</b>    |                   | <b>Dps</b>                                                                          | <b>DNA protection protein</b>               | <b>451</b>         | <b>4.43</b>     | <b>7</b>  |
|             |                   | <b>SodB</b>                                                                         | <b>Superoxide dismutase, iron</b>           | <b>376</b>         | <b>0.64</b>     | <b>2</b>  |
|             |                   | NmpC                                                                                | Outer membrane porin protein nmpC precursor | 265                | 0.71            | 6         |
|             | YciF              | Hypothetical protein b1258                                                          | 209                                         | 1.12               | 3               |           |
|             | OsmF              | Predicted transporter subunit: periplasmic–binding component of ABC superfamily     | 194                                         | 0.73               | 5               |           |
|             | SodA              | Superoxide dismutase, Mn                                                            | 139                                         | 0.84               | 4               |           |
|             | IadA              | Isoaspartyl dipeptidase                                                             | 122                                         | 0.41               | 4               |           |
|             | OppA              | Oligopeptide transporter subunit                                                    | 110                                         | 0.27               | 4               |           |
|             | YghA              | Oxidoreductase                                                                      | 103                                         | 0.40               | 3               |           |
|             | MglB              | Methyl–galactoside transporter subunit                                              | 81                                          | 0.22               | 2               |           |
|             | AnsB              | Periplasmic L–asparaginase II                                                       | 77                                          | 0.21               | 2               |           |
|             | <b>4</b>          | <b>SodB</b>                                                                         | <b>Superoxide dismutase, iron</b>           | <b>6 347</b>       | <b>13.10</b>    | <b>9</b>  |
|             |                   | Pck                                                                                 | Phosphoenolpyruvate carboxykinase           | 2 121              | 5.87            | 22        |
| Gnd         |                   | Gluconate–6–phosphate dehydrogenase, decarboxylating                                | 1 683                                       | 7.12               | 17              |           |
| CysK        |                   | Cysteine synthase A, O–acetylserine sulfhydrylase A                                 | 1 192                                       | 6.93               | 13              |           |
| AspC        |                   | Aspartate aminotransferase, PLP–dependent                                           | 1 086                                       | 4.59               | 17              |           |
| FliC        |                   | Flagellar filament structural protein (flagellin)                                   | 836                                         | 1.32               | 10              |           |
| AckA        |                   | Acetate/propionate kinase                                                           | 705                                         | 1.69               | 7               |           |
| YgeY        |                   | Hypothetical protein Z4211                                                          | 647                                         | 1.39               | 10              |           |
| FlgK        |                   | Flagellar hook–filament junction protein 1                                          | 496                                         | 0.65               | 7               |           |
| TalB        |                   | Transaldolase                                                                       | 382                                         | 0.83               | 5               |           |
| YcdX        |                   | Predicted zinc–binding hydrolase                                                    | 306                                         | 0.93               | 5               |           |
| WrbA        |                   | Predicted flavoprotein in Trp regulation                                            | 300                                         | 1.75               | 6               |           |
| SpeB        |                   | Agmatinase                                                                          | 272                                         | 0.70               | 5               |           |
| Agn43       |                   | CP4–44 prophage; antigen 43 (Ag43) phase–variable biofilm formation autotransporter | 262                                         | 0.19               | 4               |           |
| GlpQ        |                   | Periplasmic glycerophosphodiester phosphodiesterase                                 | 258                                         | 0.69               | 5               |           |
| Tpx         |                   | Thiol peroxidase                                                                    | 210                                         | 1.18               | 3               |           |
| FlgL        |                   | Flagellar hook–filament junction protein                                            | 148                                         | 0.23               | 2               |           |
| PotD        |                   | Polyamine transporter subunit                                                       | 147                                         | 0.45               | 4               |           |

|          |             |                                                                              |              |              |           |
|----------|-------------|------------------------------------------------------------------------------|--------------|--------------|-----------|
|          | OsmC        | Osmotically inducible, stress-inducible membrane protein                     | 82           | 0.58         | 2         |
|          | AhpC        | Alkyl hydroperoxide reductase, C22 subunit; detoxification of hydroperoxides | 63           | 0.40         | 2         |
|          | RpL         | 50S ribosomal protein L7/L12                                                 | 53           | 0.75         | 2         |
| <b>5</b> | <b>AldA</b> | <b>Aldehyde dehydrogenase A, NAD-linked</b>                                  | <b>2 619</b> | <b>13.62</b> | <b>23</b> |
|          | <b>CodA</b> | <b>Cytosine deaminase</b>                                                    | <b>1 130</b> | <b>3.32</b>  | <b>15</b> |
|          | GapA        | Glyceraldehyde-3-phosphate dehydrogenase                                     | 1 085        | 4.51         | 13        |
|          | PepP        | Proline aminopeptidase P II                                                  | 1 004        | 3.21         | 17        |
|          | DnaK        | Molecular chaperone DnaK                                                     | 344          | 0.52         | 8         |
|          | FliD        | Flagellar filament capping protein                                           | 338          | 0.56         | 5         |
|          | <b>SodB</b> | <b>Superoxide dismutase, iron</b>                                            | <b>212</b>   | <b>0.64</b>  | <b>2</b>  |
|          | AhpC        | Alkyl hydroperoxide reductase, C22 subunit; detoxification of hydroperoxides | 172          | 0.66         | 3         |
|          | GrpE        | Heat shock protein                                                           | 132          | 0.38         | 2         |
|          | Pgk         | Phosphoglycerate kinase                                                      | 104          | 0.19         | 2         |
|          | GadB        | Glutamate decarboxylase isozyme                                              | 89           | 0.15         | 2         |
|          | Tuf         | Elongation factor Tu                                                         | 83           | 0.18         | 2         |
|          | <b>HyaA</b> | <b>NiFe hydrogenase 1</b>                                                    | <b>54</b>    | <b>0.11</b>  | <b>2</b>  |
| <b>6</b> | PepQ        | Proline dipeptidase                                                          | 2 628        | 9.63         | 21        |
|          | GadB        | Glutamate decarboxylase isozyme                                              | 1 273        | 3.44         | 14        |
|          | DapA        | Dihydrodipicolinate synthase                                                 | 938          | 3.35         | 8         |
|          | <b>AcnA</b> | <b>Aconitate hydratase 1</b>                                                 | <b>625</b>   | <b>0.62</b>  | <b>13</b> |
|          | LysS        | Lysyl-tRNA synthetase                                                        | 604          | 1.25         | 12        |
|          | Eno         | Phosphopyruvate hydratase                                                    | 587          | 1.37         | 8         |
|          | DeoD        | Purine nucleoside phosphorylase                                              | 568          | 4.82         | 9         |
|          | FusA        | Elongation factor EF-2                                                       | 521          | 0.59         | 9         |
|          | FliY        | Cystine transporter subunit                                                  | 425          | 1.67         | 7         |
|          | GlnS        | Glutamyl-tRNA synthetase                                                     | 417          | 0.76         | 10        |
|          | KdsA        | 3-deoxy-D-manno-octulosonate 8-phosphate synthase                            | 368          | 1.50         | 7         |
|          | PotD        | Polyamine transporter subunit                                                | 354          | 1.29         | 8         |
|          | DnaK        | Molecular chaperone DnaK                                                     | 344          | 0.44         | 7         |
|          | TalB        | Transaldolase                                                                | 323          | 0.83         | 6         |
|          | Tuf         | Elongation factor Tu                                                         | 252          | 0.51         | 5         |
|          | FliC        | Flagellar filament structural protein (flagellin)                            | 245          | 0.42         | 5         |
|          | AstD        | Succinylglutamic semialdehyde dehydrogenase                                  | 223          | 0.40         | 5         |
|          | YbiB        | Predicted transferase/phosphorylase                                          | 219          | 0.66         | 5         |
|          | Moab        | Molybdopterin biosynthesis, protein B                                        | 211          | 1.55         | 5         |
|          | GapA        | Glyceraldehyde-3-phosphate dehydrogenase                                     | 207          | 0.83         | 6         |
|          | LysS        | Lysine tRNA synthetase, constitutive                                         | 200          | 0.37         | 5         |
|          | Eda         | Keto-hydroxyglutarate-aldolase/keto-deoxy-phosphogluconate aldolase          | 197          | 0.96         | 4         |
|          | AhpC        | Alkyl hydroperoxide reductase, C22 subunit; detoxification of hydroperoxides | 189          | 0.96         | 4         |
|          | Pgk         | Phosphoglycerate kinase                                                      | 173          | 0.36         | 5         |
|          | <b>SodB</b> | <b>Superoxide dismutase, iron</b>                                            | <b>165</b>   | <b>1.29</b>  | <b>4</b>  |
|          | UshA        | Bifunctional UDP-sugar hydrolase/5'-nucleotidase                             | 156          | 0.19         | 3         |
|          | UxaC        | Uronate isomerase                                                            | 149          | 0.22         | 3         |
|          | GroES       | C-chaperonin GroES                                                           | 148          | 1.65         | 3         |
|          | Fmt         | 10-formyltetrahydrofolate:L-methionyl-tRNA(fMet) N-formyltransferase         | 147          | 0.37         | 3         |
|          | Pgi         | Glucose-6-phosphate isomerase                                                | 124          | 0.19         | 3         |
|          | AldA        | Aldehyde dehydrogenase A, NAD-linked                                         | 89           | 0.15         | 2         |
|          | AspA        | Aspartate ammonia-lyase                                                      | 86           | 0.23         | 3         |
|          | Icd         | E14 prophage; isocitrate dehydrogenase, specific for NADP+                   | 64           | 0.17         | 2         |
| <b>7</b> | DprA        | Dihydropteridine reductase, NAD(P)H-dependent, oxygen-insensitive            | 1 068        | 28.81        | 17        |
|          | <b>Bfr</b>  | <b>Bacterioferritin</b>                                                      | <b>931</b>   | <b>23.89</b> | <b>11</b> |
|          | gi 15832699 | Putative formate acetyltransferase                                           | 712          | 17.20        | 9         |

|          |             |                                                                              |              |             |           |
|----------|-------------|------------------------------------------------------------------------------|--------------|-------------|-----------|
|          | FliY        | Cystine transporter subunit                                                  | 637          | 4.58        | 10        |
|          | PepQ        | Proline dipeptidase                                                          | 455          | 0.54        | 4         |
|          | YbiB        | Predicted transferase/phosphorylase                                          | 426          | 1.75        | 8         |
|          | HchA        | Hsp31 molecular chaperone                                                    | 190          | 0.41        | 3         |
|          | <b>Def</b>  | <b>Peptide deformylase</b>                                                   | <b>168</b>   | <b>1.06</b> | <b>4</b>  |
|          | GpmM        | Phosphoglycerate mutase III, cofactor-independent                            | 155          | 0.21        | 3         |
|          | RpiA        | Ribose-5-phosphate isomerase A                                               | 148          | 0.59        | 3         |
|          | MogA        | Molybdenum cofactor biosynthesis protein                                     | 147          | 0.64        | 3         |
|          | AhpC        | Alkyl hydroperoxide reductase, C22 subunit; detoxification of hydroperoxides | 140          | 0.54        | 4         |
|          | Rpe         | Ribulose-phosphate 3-epimerase                                               | 138          | 0.54        | 3         |
|          | YjbJ        | Hypothetical protein Z5644                                                   | 134          | 2.32        | 3         |
|          | SpeE        | Spermidine synthase (putrescine aminopropyltransferase)                      | 126          | 0.24        | 2         |
|          | gi 38704245 | FKBP-type 22KD peptidyl-prolyl cis-trans isomerase                           | 110          | 0.37        | 2         |
|          | Pgk         | Phosphoglycerate kinase                                                      | 106          | 0.19        | 2         |
|          | DapA        | Dihydrodipicolinate synthase                                                 | 89           | 0.25        | 2         |
|          | RplL        | 50S ribosomal protein L7/L12                                                 | 56           | 0.75        | 2         |
| <b>8</b> | <b>KatE</b> | <b>Hydroperoxidase HP11 (catalase)</b>                                       | <b>1 972</b> | <b>3.32</b> | <b>25</b> |
|          | CpdB        | 2':3'-cyclic-nucleotide 2'-phosphodiesterase                                 | 1 935        | 4.38        | 21        |
|          | AnsB        | Periplasmic L-asparaginase II                                                | 1 480        | 4.72        | 13        |
|          | GadB        | Glutamate decarboxylase isozyme                                              | 1 346        | 2.88        | 10        |
|          | PflB        | Pyruvate formate lyase I                                                     | 967          | 1.76        | 21        |
|          | ArtI        | Arginine transporter subunit                                                 | 767          | 4.54        | 7         |
|          | gi 75209368 | COG0371: Glycerol dehydrogenase and related enzymes                          | 728          | 2.01        | 8         |
|          | ArgT        | Lysine/arginine/ornithine transporter subunit                                | 643          | 3.57        | 9         |
|          | <b>YgfN</b> | <b>Xanthine dehydrogenase like protein, Mo and FeS containing subunit</b>    | <b>467</b>   | <b>0.32</b> | <b>7</b>  |
|          | IadA        | Isoaspartyl dipeptidase                                                      | 467          | 1.00        | 7         |
|          | NmpC        | Outer membrane porin protein nmpC precursor                                  | 464          | 1.23        | 6         |
|          | GapA        | Glyceraldehyde-3-phosphate dehydrogenase                                     | 452          | 2.02        | 9         |
|          | FliC        | Flagellar filament structural protein (flagellin)                            | 447          | 0.75        | 7         |
|          | UshA        | Bifunctional UDP-sugar hydrolase/5'-nucleotidase                             | 404          | 0.70        | 9         |
|          | DnaK        | Molecular chaperone DnaK                                                     | 399          | 0.44        | 5         |
|          | GroEL       | Chaperonin GroEL                                                             | 360          | 0.65        | 8         |
|          | OmpC        | Outer membrane porin protein C                                               | 353          | 0.86        | 6         |
|          | FolE        | GTP cyclohydrolase I                                                         | 306          | 1.03        | 4         |
|          | FsaA        | Fructose-6-phosphate aldolase 1                                              | 301          | 1.15        | 3         |
|          | NagB        | Glucosamine-6-phosphate deaminase                                            | 270          | 1.04        | 5         |
|          | YgfM        | Predicted oxidoreductase; possible component of selenate reductase           | 190          | 0.85        | 5         |
|          | PanC        | Pantothenate synthetase                                                      | 179          | 0.57        | 4         |
|          | TktA        | Transketolase 1, thiamin-binding                                             | 174          | 0.11        | 2         |
|          | PanB        | 3-methyl-2-oxobutanoate hydroxymethyltransferase                             | 168          | 0.46        | 3         |
|          | FliD        | Flagellar filament capping protein                                           | 165          | 0.25        | 3         |
|          | LamB        | Maltose outer membrane porin (maltoporin)                                    | 163          | 0.16        | 2         |
|          | gi 15833050 | Fructose-bisphosphate aldolase                                               | 150          | 0.20        | 2         |
|          | Prr         | Medium chain aldehyde dehydrogenase                                          | 136          | 0.15        | 2         |
|          | Agp         | Glucose-1-phosphatase/inositol phosphatase                                   | 136          | 0.17        | 2         |
|          | DeoD        | Purine nucleoside phosphorylase                                              | 132          | 0.50        | 3         |
|          | Pgk         | Phosphoglycerate kinase                                                      | 130          | 0.30        | 3         |
|          | Tuf         | Elongation factor Tu                                                         | 125          | 0.28        | 3         |
|          | YgeW        | Ornithine carbamoyltransferase                                               | 106          | 0.18        | 2         |
|          | AspC        | Aspartate aminotransferase, PLP-                                             | 105          | 0.28        | 3         |

|                                                  |             |                                                                                               |            |             |                      |
|--------------------------------------------------|-------------|-----------------------------------------------------------------------------------------------|------------|-------------|----------------------|
|                                                  |             | dependent                                                                                     |            |             |                      |
|                                                  | PykA        | Pyruvate kinase II                                                                            | 103        | 0.23        | 3                    |
|                                                  | YjbJ        | Hypothetical protein Z5644                                                                    | 88         | 1.23        | 2                    |
|                                                  | FucU        | Protein of fucose operon                                                                      | 85         | 0.96        | 2                    |
|                                                  | AtoB        | Acetyl-CoA acetyltransferase                                                                  | 81         | 0.16        | 2                    |
|                                                  | MoaC        | Molybdenum cofactor biosynthesis protein C                                                    | 60         | 0.49        | 2                    |
| <b>9</b>                                         | DapD        | 2,3,4,5-tetrahydropyridine-2-carboxylate N-succinyltransferase                                | 1 346      | 12.54       | 16                   |
|                                                  | Mdh         | Malate dehydrogenase                                                                          | 1 214      | 6.21        | 14                   |
|                                                  | gi 89108341 | Hypothetical protein                                                                          | 890        | 1.51        | 12                   |
|                                                  | gi 16132194 | Periplasmic protein                                                                           | 639        | 2.81        | 7                    |
|                                                  | LysS        | Lysyl-tRNA synthetase                                                                         | 597        | 1.55        | 14                   |
|                                                  | MglB        | Methyl-galactoside transporter subunit                                                        | 546        | 2.67        | 11                   |
|                                                  | FusA        | Elongation factor EF-2                                                                        | 497        | 0.67        | 11                   |
|                                                  | DnaK        | Molecular chaperone DnaK                                                                      | 482        | 0.78        | 8                    |
|                                                  | PurH        | Fused IMP cyclohydrolase/phosphoribosylaminoimidazolecarboxamide formyltransferase            | 480        | 1.12        | 11                   |
|                                                  | RfaD        | ADP-L-glycero-D-mannoheptose-6-epimerase                                                      | 464        | 2.08        | 10                   |
|                                                  | MoaB        | Molybdopterin biosynthesis, protein B                                                         | 382        | 4.38        | 8                    |
|                                                  | <b>NrfA</b> | <b>Periplasmic nitrite reductase</b>                                                          | <b>375</b> | <b>0.70</b> | <b>7</b>             |
|                                                  | <b>FumB</b> | <b>Fumarase B</b>                                                                             | <b>345</b> | <b>0.71</b> | <b>9<sup>d</sup></b> |
|                                                  | Agp         | Glucose-1-phosphatase/inositol phosphatase                                                    | 323        | 0.73        | 7                    |
|                                                  | LysS        | Lysine tRNA synthetase, constitutive                                                          | 312        | 0.65        | 7                    |
|                                                  | gi 146196   | Citrate synthase                                                                              | 307        | 0.56        | 6                    |
|                                                  | Eno         | Phosphopyruvate hydratase                                                                     | 304        | 0.73        | 5                    |
|                                                  | Tuf         | Elongation factor Tu                                                                          | 265        | 0.64        | 6                    |
|                                                  | <b>FumA</b> | <b>Fumarase A</b>                                                                             | <b>262</b> | <b>0.35</b> | <b>5<sup>d</sup></b> |
|                                                  | Zwf         | Glucose-6-phosphate dehydrogenase                                                             | 242        | 0.57        | 7                    |
|                                                  | gi 15834295 | Single-strand DNA-binding protein                                                             | 204        | 0.74        | 2                    |
|                                                  | GroEL       | Chaperonin GroEL                                                                              | 190        | 0.37        | 5                    |
|                                                  | AspA        | Aspartate ammonia-lyase                                                                       | 160        | 0.31        | 4                    |
|                                                  | PepT        | Peptidase T                                                                                   | 145        | 0.27        | 3                    |
|                                                  | gi 146011   | 5,10-methylene-tetrahydrofolate dehydrogenase/5, 10-methenyl-tetrahydrofolate cyclo-hydrolase | 92         | 0.26        | 2                    |
|                                                  | AroG        | 3-deoxy-7-phosphoheptulonate synthase                                                         | 84         | 0.21        | 2                    |
|                                                  | RpsA        | 30S ribosomal protein S1                                                                      | 78         | 0.19        | 3                    |
|                                                  | gi 49176017 | Bacterial alkaline phosphatase                                                                | 74         | 0.16        | 2                    |
| * FumA has 3 unique peptides in common with FumB |             |                                                                                               |            |             |                      |
| <b>10</b>                                        | PflB        | Pyruvate formate lyase I                                                                      | 1 984      | 4.44        | 30                   |
|                                                  | IadA        | Isoaspartyl dipeptidase                                                                       | 1 759      | 6.34        | 15                   |
|                                                  | FliC        | flagellar filament structural protein (flagellin)                                             | 1 282      | 2.54        | 11                   |
|                                                  | Prr         | Medium chain aldehyde dehydrogenase                                                           | 1 275      | 2.31        | 11                   |
|                                                  | ArtI        | Arginine transporter subunit                                                                  | 1 153      | 8.83        | 11                   |
|                                                  | NmpC        | Outer membrane porin protein nmpC precursor                                                   | 1 070      | 2.18        | 9                    |
|                                                  | gi 75209368 | COG0371: Glycerol dehydrogenase and related enzymes                                           | 970        | 3.34        | 9                    |
|                                                  | CpdB        | 2':3'-cyclic-nucleotide 2'-phosphodiesterase                                                  | 787        | 0.75        | 11                   |
|                                                  | <b>KatE</b> | <b>Hydroperoxidase HPII (catalase)</b>                                                        | <b>775</b> | <b>1.08</b> | <b>14</b>            |
|                                                  | Eno         | Phosphopyruvate hydratase                                                                     | 773        | 1.78        | 9                    |
|                                                  | AspA        | Aspartate ammonia-lyase                                                                       | 767        | 2.18        | 12                   |
|                                                  | OmpC        | Outer membrane porin protein C                                                                | 763        | 1.66        | 8                    |
|                                                  | LysS        | Lysyl-tRNA synthetase                                                                         | 758        | 1.89        | 16                   |
|                                                  | ClpP        | ATP-dependent Clp protease proteolytic subunit                                                | 729        | 1.89        | 4                    |
|                                                  | DnaK        | Molecular chaperone DnaK                                                                      | 600        | 0.78        | 8                    |
|                                                  | AnsB        | Periplasmic L-asparaginase II                                                                 | 578        | 1.39        | 5                    |
|                                                  | GapA        | Glyceraldehyde-3-phosphate dehydrogenase                                                      | 498        | 1.73        | 8                    |

|           |             |                                                                                       |              |             |           |
|-----------|-------------|---------------------------------------------------------------------------------------|--------------|-------------|-----------|
|           | LysS        | Lysine tRNA synthetase, constitutive                                                  | 393          | 0.87        | 10        |
|           | Tuf         | Elongation factor Tu                                                                  | 382          | 0.78        | 6         |
|           | Asd         | Aspartate–semialdehyde dehydrogenase                                                  | 315          | 1.23        | 8         |
|           | RfaD        | ADP–L–glycero–D–mannoheptose–6–epimerase                                              | 291          | 1.05        | 5         |
|           | LamB        | Maltose outer membrane porin (maltoporin)                                             | 277          | 0.43        | 4         |
|           | OmpF        | Outer membrane porin 1a (1a;b;F)                                                      | 275          | 0.73        | 6         |
|           | GroEL       | Chaperonin GroEL                                                                      | 273          | 0.46        | 6         |
|           | AtoB        | Acetyl–CoA acetyltransferase                                                          | 219          | 0.42        | 4         |
|           | RpoA        | DNA–directed RNA polymerase alpha subunit                                             | 204          | 0.63        | 5         |
|           | ProA        | Gamma–glutamylphosphate reductase                                                     | 203          | 0.38        | 4         |
|           | GadB        | Glutamate decarboxylase isozyme                                                       | 199          | 0.23        | 3         |
|           | OmpW        | Outer membrane protein W                                                              | 183          | 0.59        | 2         |
|           | TdcE        | Pyruvate formate–lyase 4/2–ketobutyrate formate–lyase                                 | 162          | 0.18        | 4         |
|           | DeoD        | Purine nucleoside phosphorylase                                                       | 157          | 0.72        | 4         |
|           | GcvP        | Glycine decarboxylase, PLP–dependent, subunit (protein P) of glycine cleavage complex | 142          | 0.11        | 3         |
|           | YebC        | Hypothetical protein b1864                                                            | 132          | 0.31        | 2         |
|           | RplI        | 50S ribosomal protein L9                                                              | 109          | 0.55        | 2         |
|           | GrpE        | Heat shock protein                                                                    | 107          | 0.38        | 2         |
|           | PanC        | Pantothenate synthetase                                                               | 94           | 0.08        | 2         |
|           | FsaA        | Fructose–6–phosphate aldolase 1                                                       | 71           | 0.36        | 2         |
|           | MinE        | Cell division topological specificity factor MinE                                     | 64           | 0.93        | 2         |
|           | FusA        | Elongation factor EF–2                                                                | 50           | 0.10        | 2         |
| <b>11</b> | <b>YgfN</b> | <b>Xanthine dehydrogenase like protein, Mo and FeS containing subunit</b>             | <b>1 366</b> | <b>1.74</b> | <b>23</b> |
|           | <b>KatE</b> | <b>Hydroperoxidase HP11 (catalase)</b>                                                | <b>1 310</b> | <b>2.19</b> | <b>20</b> |
|           | NmpC        | Outer membrane porin protein nmpC precursor                                           | 619          | 1.91        | 9         |
|           | GapA        | Glyceraldehyde–3–phosphate dehydrogenase                                              | 295          | 1.02        | 6         |
|           | <b>SodB</b> | <b>Superoxide dismutase, iron</b>                                                     | <b>278</b>   | <b>0.94</b> | <b>3</b>  |
|           | YgfM        | Predicted oxidoreductase; possible component of selenate reductase                    | 253          | 1.10        | 5         |
|           | OmpC        | Outer membrane porin protein C                                                        | 138          | 0.31        | 3         |
|           | <b>CodA</b> | <b>Cytosine deaminase</b>                                                             | <b>127</b>   | <b>0.16</b> | <b>2</b>  |
|           | IadA        | Isoaspartyl dipeptidase                                                               | 81           | 0.19        | 2         |
| <b>12</b> | <b>YgfN</b> | <b>Xanthine dehydrogenase like protein, Mo and FeS containing subunit</b>             | <b>1 470</b> | <b>1.84</b> | <b>23</b> |
|           | IadA        | Isoaspartyl dipeptidase                                                               | 1 094        | 3.36        | 15        |
|           | YgfM        | Predicted oxidoreductase; possible component of selenate reductase                    | 527          | 2.03        | 8         |
|           | NmpC        | Outer membrane porin protein nmpC precursor                                           | 424          | 1.23        | 8         |
|           | GapA        | Glyceraldehyde–3–phosphate dehydrogenase                                              | 156          | 0.65        | 5         |
|           | <b>KatE</b> | <b>Hydroperoxidase HP11 (catalase)</b>                                                | <b>101</b>   | <b>0.09</b> | <b>2</b>  |
| <b>13</b> | <b>Bfr</b>  | <b>Bacterioferritin</b>                                                               | <b>578</b>   | <b>5.62</b> | <b>7</b>  |
|           | <b>Ftn</b>  | <b>Ferritin</b>                                                                       | <b>398</b>   | <b>2.54</b> | <b>6</b>  |
|           | gi 38704050 | Fructose–bisphosphate aldolase                                                        | 338          | 0.93        | 7         |
|           | NmpC        | Outer membrane porin protein nmpC precursor                                           | 322          | 0.71        | 6         |
|           | GroEL       | Chaperonin GroEL                                                                      | 251          | 0.46        | 6         |
|           | Tuf         | Elongation factor Tu                                                                  | 136          | 0.28        | 3         |
|           | GuaB        | Inositol–5–monophosphate dehydrogenase                                                | 128          | 0.23        | 3         |
|           | YghZ        | Aldo–keto reductase                                                                   | 128          | 0.32        | 3         |
|           | GlnH        | Glutamine ABC transporter periplasmic–binding protein                                 | 93           | 0.30        | 2         |
|           | gi 147461   | Aspartate transcarbamoylase catalytic chain                                           | 85           | 0.23        | 2         |
|           | FabI        | Enoyl–(acyl carrier protein) reductase                                                | 62           | 0.29        | 2         |

|           |             |                                                                                                                                                           |              |             |          |
|-----------|-------------|-----------------------------------------------------------------------------------------------------------------------------------------------------------|--------------|-------------|----------|
| <b>14</b> | <b>Bfr</b>  | <b>Bacterioferritin</b>                                                                                                                                   | <b>464</b>   | <b>3.54</b> | <b>6</b> |
|           | gi 38704050 | Fructose-bisphosphate aldolase                                                                                                                            | 390          | 1.32        | 9        |
|           | MglB        | Methyl-galactoside transporter subunit                                                                                                                    | 354          | 0.82        | 6        |
|           | <b>Ftn</b>  | <b>Ferritin</b>                                                                                                                                           | <b>339</b>   | <b>1.47</b> | <b>5</b> |
|           | GroEL       | Chaperonin GroEL                                                                                                                                          | 328          | 0.65        | 8        |
|           | NmpC        | Outer membrane porin protein nmpC precursor                                                                                                               | 229          | 0.56        | 5        |
|           | YghZ        | Aldo-keto reductase                                                                                                                                       | 139          | 0.44        | 4        |
|           | RpoA        | DNA-directed RNA polymerase alpha subunit                                                                                                                 | 118          | 0.34        | 3        |
|           | RpoA        | DNA-directed RNA polymerase beta' subunit                                                                                                                 | 92           | 0.05        | 2        |
|           | GlnH        | Glutamine ABC transporter periplasmic-binding protein                                                                                                     | 82           | 0.30        | 2        |
|           | Tuf         | Elongation factor Tu                                                                                                                                      | 81           | 0.18        | 2        |
|           | PykA        | Pyruvate kinase II                                                                                                                                        | 78           | 0.15        | 2        |
| <b>15</b> | <b>Bfr</b>  | <b>Bacterioferritin</b>                                                                                                                                   | <b>262</b>   | <b>3.50</b> | <b>6</b> |
|           | Tuf         | Elongation factor Tu                                                                                                                                      | 244          | 0.50        | 5        |
|           | SodC        | Superoxide dismutase precursor (Cu-Zn)                                                                                                                    | 205          | 0.65        | 4        |
|           | GalU        | Glucose-1-phosphate uridylyltransferase                                                                                                                   | 202          | 0.52        | 3        |
|           | RfaD        | ADP-L-glycero-D-mannoheptose-6-epimerase                                                                                                                  | 102          | 0.46        | 3        |
|           | gi 75515034 | COG0589: Universal stress protein UspA and related nucleotide-binding proteins                                                                            | 86           | 0.35        | 2        |
|           | YgiN        | Hypothetical protein Z4380                                                                                                                                | 82           | 0.35        | 3        |
| <b>16</b> | <b>SodB</b> | <b>Superoxide dismutase, iron</b>                                                                                                                         | <b>1 179</b> | <b>0.94</b> | <b>3</b> |
|           | NmpC        | Outer membrane porin protein nmpC precursor                                                                                                               | 586          | 1.91        | 10       |
|           |             | <b>Formate dehydrogenase-O, major subunit (Formate dehydrogenase-O subunit alpha) (FDH-Z subunit alpha) (Aerobic formate dehydrogenase major subunit)</b> |              |             | <b>6</b> |
|           | <b>FdoG</b> |                                                                                                                                                           | <b>287</b>   | <b>0.21</b> |          |
|           | OmpC        | Outer membrane porin protein C                                                                                                                            | 266          | 0.86        | 7        |
|           | YjgB        | Predicted alcohol dehydrogenase, Zn-dependent and NAD(P)-binding                                                                                          | 169          | 0.47        | 4        |
|           | GapA        | Glyceraldehyde-3-phosphate dehydrogenase                                                                                                                  | 155          | 0.65        | 5        |
|           | MoaB        | Molybdopterin biosynthesis, protein B                                                                                                                     | 87           | 0.45        | 2        |
|           | Pgi         | Glucose-6-phosphate isomerase                                                                                                                             | 77           | 0.12        | 2        |
|           | gi 146632   | LS-BP precursor                                                                                                                                           | 76           | 0.20        | 2        |
|           | <b>FdoH</b> | <b>Formate dehydrogenase-O, Fe-S subunit</b>                                                                                                              | <b>35</b>    | <b>0.11</b> | <b>1</b> |
| <b>17</b> | IadA        | Putative formate acetyltransferase                                                                                                                        | 575          | 28.51       | 10       |
|           | AhpC        | Alkyl hydroperoxide reductase, C22 subunit; detoxification of hydroperoxides                                                                              | 531          | 5.40        | 9        |
|           | NemA        | N-ethylmaleimide reductase, FMN-linked                                                                                                                    | 502          | 2.25        | 11       |
|           | FliC        | Flagellar filament structural protein (flagellin)                                                                                                         | 467          | 0.64        | 6        |
|           | FliY        | Cystine transporter subunit                                                                                                                               | 412          | 1.36        | 6        |
|           | MogA        | Molybdenum cofactor biosynthesis protein                                                                                                                  | 389          | 3.40        | 6        |
|           | gi 38704245 | FKBP-type 22KD peptidyl-prolyl cis-trans isomerase                                                                                                        | 352          | 2.04        | 4        |
|           | <b>Fur</b>  | <b>Ferric uptake regulator</b>                                                                                                                            | <b>342</b>   | <b>2.43</b> | <b>4</b> |
|           | gi 89108648 | Hypothetical protein                                                                                                                                      | 335          | 2.93        | 4        |
|           | RplL        | 50S ribosomal protein L7/L12                                                                                                                              | 311          | 3.03        | 5        |
|           | <b>Bfr</b>  | <b>Bacterioferritin</b>                                                                                                                                   | <b>268</b>   | <b>1.13</b> | <b>4</b> |
|           | gi 75209368 | COG0371: Glycerol dehydrogenase and related enzymes                                                                                                       | 236          | 0.58        | 5        |
|           | <b>LuxS</b> | <b>S-ribosylhomocysteinase</b>                                                                                                                            | <b>227</b>   | <b>0.71</b> | <b>3</b> |
|           | DeoD        | Purine nucleoside phosphorylase                                                                                                                           | 219          | 0.97        | 5        |
|           | Hns         | DNA-binding protein HLP-II (HU, BH2, HD, NS); pleiotropic regulator                                                                                       | 214          | 0.96        | 3        |
|           | TrxB        | Thioredoxin reductase                                                                                                                                     | 202          | 0.67        | 4        |
|           | YbiB        | Predicted transferase/phosphorylase                                                                                                                       | 190          | 0.50        | 4        |
|           | Bcp         | Bacterioferritin comigratory protein                                                                                                                      | 180          | 0.48        | 2        |



|             |                                                  |     |      |   |
|-------------|--------------------------------------------------|-----|------|---|
| YieF        | Hypothetical protein Z5208                       | 163 | 0.99 | 4 |
| gi 15832673 | Regulatory protein P-II for glutamine synthetase | 150 | 1.29 | 3 |
| gi 16129288 | Predicted hydrolase                              | 142 | 0.52 | 4 |
| GpmM        | Phosphoglycero mutase III, cofactor-independent  | 140 | 0.14 | 2 |
| TpiA        | Triosephosphate isomerase                        | 135 | 0.30 | 2 |
| gi 133976   | 30S ribosomal protein S6                         | 134 | 0.95 | 3 |
| Tig         | Trigger factor                                   | 117 | 0.16 | 2 |
| YdjA        | Hypothetical protein Z2798                       | 113 | 0.42 | 2 |
| YniC        | Predicted hydrolase                              | 112 | 0.54 | 3 |
| YeiG        | Predicted esterase                               | 110 | 0.40 | 3 |
| YjbJ        | Hypothetical protein Z5644                       | 106 | 1.23 | 2 |
| Ppa         | Inorganic pyrophosphatase                        | 85  | 0.43 | 2 |
| FlgL        | Flagellar hook-filament junction protein         | 82  | 0.23 | 2 |

<sup>a</sup>Genes from Database *E. coli* K12 genome (www.ecocyc.com); <sup>b</sup>Mascot identity threshold  $p < 0.05$ . Spot numbers correspond to numbered positions in Fig. 1A; <sup>c</sup>emPAI is a measure for the relative abundance of proteins in a spot; <sup>d</sup>Three unique peptides that were detected occur in both FumA and FumB and cannot be unambiguously assigned to either one of them. They have now been assigned to both FumA and FumB.

The position of spot number is indicated in Fig. S1A. This table contains just proteins with number of unique peptides  $\geq 2$ .

**Table S2** Protein identification by LC MS/MS after native–native 2D–PAGE separation of *E. coli* soluble protein extract obtained from growth in LB medium containing 40  $\mu$ M Fe.

| Spot #      | Gene <sup>a</sup> | Protein                                                             | Mascot protein score <sup>b</sup>            | emPAI <sup>c</sup> | Unique peptides |           |
|-------------|-------------------|---------------------------------------------------------------------|----------------------------------------------|--------------------|-----------------|-----------|
| <b>1</b>    | <b>Ftn</b>        | <b>Ferritin</b>                                                     | <b>1 373</b>                                 | <b>24.90</b>       | <b>15</b>       |           |
|             | PflB              | Pyruvate formate lyase I                                            | 823                                          | 1.05               | 16              |           |
|             | Mdh               | Malate dehydrogenase                                                | 548                                          | 2.00               | 6               |           |
|             | GapA              | Glyceraldehyde–3–phosphate dehydrogenase                            | 377                                          | 1.02               | 5               |           |
|             | NfsB              | Nitroreductase A, NADPH–dependent, FMN–dependent                    | 359                                          | 1.86               | 8               |           |
|             | DnaK              | Molecular chaperone DnaK                                            | 218                                          | 0.30               | 5               |           |
|             | AlaS              | Alanyl–tRNA synthetase                                              | 211                                          | 0.25               | 5               |           |
|             | PykA              | Pyruvate kinase II                                                  | 146                                          | 0.32               | 4               |           |
|             | Rnr_Pfl           | Putative formate acetyltransferase                                  | 135                                          | 1.07               | 3               |           |
|             | Eda               | Keto–hydroxyglutarate–aldolase/keto–deoxy–phosphogluconate aldolase | 114                                          | 0.37               | 2               |           |
|             | Tsf               | Elongation factor Ts                                                | 107                                          | 0.26               | 2               |           |
|             | XdhB              | Xanthine dehydrogenase, FAD–binding subunit                         | 91                                           | 0.25               | 2               |           |
|             | AspC              | Aspartate aminotransferase, PLP–dependent                           | 78                                           | 0.18               | 2               |           |
|             | Fbp               | Fructose–biphosphate aldolase                                       | 76                                           | 0.20               | 2               |           |
|             | <b>SodB</b>       | <b>Superoxide dismutase, iron</b>                                   | <b>75</b>                                    | <b>0.64</b>        | <b>3</b>        |           |
|             | XdhA              | Xanthine dehydrogenase, molybdenum binding subunit                  | 73                                           | 0.09               | 1               |           |
|             | <b>Bfr</b>        | <b>Bacterioferritin</b>                                             | <b>65</b>                                    | <b>0.46</b>        | <b>2</b>        |           |
|             | GroEL             | Chaperonin GroEL                                                    | 61                                           | 0.13               | 2               |           |
|             | TalB              | Transaldolase                                                       | 56                                           | 0.22               | 2               |           |
|             | <b>2</b>          | <b>YgfK</b>                                                         | <b>Putative oxidoreductase, Fe–S subunit</b> | <b>3 967</b>       | <b>5.25</b>     | <b>45</b> |
| PflB        |                   | Pyruvate formate lyase I                                            | 2 228                                        | 5.73               | 38              |           |
| GadB        |                   | Glutamate decarboxylase isozyme                                     | 1 097                                        | 2.17               | 13              |           |
| DnaK        |                   | Molecular chaperone DnaK                                            | 693                                          | 0.87               | 11              |           |
| GapA        |                   | Glyceraldehyde–3–phosphate dehydrogenase                            | 627                                          | 1.73               | 8               |           |
| <b>SodB</b> |                   | <b>Superoxide dismutase, Fe</b>                                     | <b>504</b>                                   | <b>2.18</b>        | <b>6</b>        |           |
| PckA        |                   | Phosphoenolpyruvate carboxykinase                                   | 415                                          | 0.52               | 6               |           |
| Rnr_Pfl     |                   | Putative formate acetyltransferase                                  | 321                                          | 3.27               | 5               |           |
| FliC        |                   | Flagellar filament structural protein (flagellin)                   | 282                                          | 0.52               | 5               |           |
| UshA        |                   | Bifunctional UDP–sugar hydrolase/5'–nucleotidase                    | 269                                          | 0.27               | 4               |           |
| PanC        |                   | Pantothenate synthetase                                             | 247                                          | 1.20               | 5               |           |
| TalB        |                   | Transaldolase                                                       | 195                                          | 0.35               | 3               |           |
| GrpE        |                   | Heat shock protein                                                  | 183                                          | 0.91               | 4               |           |
| NmpC        |                   | Outer membrane porin protein nmpC precursor                         | 176                                          | 0.31               | 3               |           |
| YfcZ        |                   | Hypothetical protein                                                | 163                                          | 1.60               | 3               |           |
| <b>CodA</b> |                   | <b>Cytosine deaminase</b>                                           | <b>147</b>                                   | <b>0.25</b>        | <b>3</b>        |           |
| <b>3</b>    |                   | <b>CodA</b>                                                         | <b>Cytosine deaminase</b>                    | <b>1 703</b>       | <b>5.71</b>     | <b>17</b> |
|             |                   | <b>YgfK</b>                                                         | <b>Putative oxidoreductase, Fe–S subunit</b> | <b>944</b>         | <b>1.04</b>     | <b>21</b> |
|             |                   | PflB                                                                | Pyruvate formate lyase I                     | 896                | 1.43            | 20        |
|             |                   | GapA                                                                | Glyceraldehyde–3–phosphate dehydrogenase     | 6.97               | 2.69            | 12        |
|             | DnaK              | Molecular chaperone DnaK                                            | 657                                          | 0.97               | 11              |           |
|             | GadB              | Glutamate decarboxylase isozyme                                     | 635                                          | 1.26               | 11              |           |
|             | FliC              | Flagellar filament structural protein (flagellin)                   | 470                                          | 1.17               | 9               |           |
|             | <b>SodB</b>       | <b>Superoxide dismutase, iron</b>                                   | <b>285</b>                                   | <b>1.70</b>        | <b>4</b>        |           |
|             | PckA              | Phosphoenolpyruvate carboxykinase                                   | 238                                          | 0.52               | 6               |           |
|             | GrpE              | Heat shock protein                                                  | 212                                          | 0.91               | 3               |           |
|             | YfcZ              | Hypothetical protein                                                | 180                                          | 2.58               | 3               |           |

|          |             |                                                                              |              |              |           |
|----------|-------------|------------------------------------------------------------------------------|--------------|--------------|-----------|
|          | PanC        | Pantothenate synthetase                                                      | 176          | 0.75         | 4         |
|          | Rnr_Pfl     | Putative formate acetyltransferase                                           | 173          | 1.07         | 3         |
|          | UshA        | Bifunctional UDP-sugar hydrolase/5'-nucleotidase                             | 140          | 0.19         | 3         |
|          | NmpC        | Outer membrane porin protein nmpC precursor                                  | 134          | 0.19         | 2         |
|          | YbiB        | Predicted transferase/phosphorylase                                          | 122          | 0.36         | 3         |
|          | AldA        | Aldehyde dehydrogenase A, NAD-linked                                         | 117          | 0.23         | 3         |
|          | AhpC        | Alkyl hydroperoxide reductase, C22 subunit; detoxification of hydroperoxides | 106          | 0.40         | 2         |
| <b>4</b> | <b>SodB</b> | <b>Superoxide dismutase, iron</b>                                            | <b>3 928</b> | <b>9.13</b>  | <b>7</b>  |
|          | PckA        | Phosphoenolpyruvate carboxykinase                                            | 2 702        | 8.86         | 24        |
|          | GorA        | Glutathione oxidoreductase                                                   | 1 762        | 3.34         | 15        |
|          | AckA        | Acetate/propionate kinase                                                    | 879          | 2.44         | 12        |
|          | Gnd         | Gluconate-6-phosphate dehydrogenase, decarboxylating                         | 841          | 1.85         | 11        |
|          | Icd         | E14 prophage; isocitrate dehydrogenase, specific for NADP+                   | 534          | 1.55         | 10        |
|          | AspC        | Aspartate aminotransferase, PLP-dependent                                    | 289          | 0.93         | 8         |
|          | Mdh         | Malate dehydrogenase                                                         | 259          | 0.55         | 3         |
|          | <b>Ftn</b>  | <b>Ferritin</b>                                                              | <b>177</b>   | <b>0.44</b>  | <b>2</b>  |
|          | YcdX        | Predicted zinc-binding hydrolase                                             | 176          | 0.48         | 2         |
|          | CysK        | Cysteine synthase A, O-acetylserine sulfhydrylase A                          | 173          | 0.36         | 2         |
|          | AhpC        | Alkyl hydroperoxide reductase, C22 subunit; detoxification of hydroperoxides | 163          | 0.66         | 3         |
|          | SpeB        | Agmatinase                                                                   | 151          | 0.37         | 3         |
|          | PepN        | Aminopeptidase N                                                             | 151          | 0.12         | 2         |
|          | TalB        | Transaldolase                                                                | 142          | 0.35         | 3         |
|          | GlpQ        | Periplasmic glycerophosphodiester phosphodiesterase                          | 91           | 0.19         | 2         |
|          | FliC        | Flagellar filament structural protein (flagellin)                            | 68           | 0.15         | 2         |
| <b>5</b> | <b>AcnA</b> | <b>COG1048: Aconitase A</b>                                                  | <b>4 900</b> | <b>13.93</b> | <b>47</b> |
|          | RihC        | Ribonucleoside hydrolase 3                                                   | 2 167        | 5.31         | 12        |
|          | DnaK        | Molecular chaperone DnaK                                                     | 2 118        | 4.06         | 22        |
|          | FliY        | Cystine transporter subunit                                                  | 1 904        | 30.18        | 17        |
|          | KdsA        | 3-deoxy-D-manno-oculosonate 8-phosphate synthase                             | 1 851        | 13.00        | 15        |
|          | PepQ        | Proline dipeptidase                                                          | 1 131        | 3.19         | 15        |
|          | GapA        | Glyceraldehyde-3-phosphate dehydrogenase                                     | 977          | 1.73         | 9         |
|          | <b>SodB</b> | <b>Superoxide dismutase, iron</b>                                            | <b>646</b>   | <b>6.28</b>  | <b>7</b>  |
|          | HtpG        | Heat shock protein 90                                                        | 640          | 1.49         | 18        |
|          | <b>YgfK</b> | <b>Putative oxidoreductase, Fe-S</b>                                         | <b>557</b>   | <b>0.45</b>  | <b>13</b> |
|          | Rpe         | Ribulose-phosphate 3-epimerase                                               | 541          | 2.65         | 7         |
|          | Pgi         | Glucose-6-phosphate isomerase                                                | 473          | 0.60         | 7         |
|          | SodA        | Superoxide dismutase, Mn                                                     | 450          | 1.92         | 6         |
|          | GrpE        | Heat shock protein                                                           | 436          | 2.66         | 7         |
|          | SerS        | Seryl-tRNA synthetase                                                        | 313          | 1.26         | 12        |
|          | AtoB        | Acetyl-CoA acetyltransferase                                                 | 309          | 0.42         | 4         |
|          | GadB        | Glutamate decarboxylase isozyme                                              | 270          | 0.40         | 5         |
|          | Mdh         | Malate dehydrogenase                                                         | 248          | 0.73         | 5         |
|          | RibH        | Riboflavin synthase subunit beta                                             | 240          | 0.91         | 3         |
|          | PflB        | Pyruvate formate lyase I                                                     | 232          | 0.35         | 8         |
|          | TdcE        | Pyruvate formate-lyase 4/2-Ketobutyrate formate-lyase                        | 231          | 0.18         | 5         |
|          | DapA        | Dihydrodipicolinate synthase                                                 | 184          | 0.57         | 5         |
|          | FliC        | Flagellar filament structural protein (flagellin)                            | 180          | 0.32         | 6         |
|          | Eda         | Keto-hydroxyglutarate-aldolase/keto-deoxy-phosphogluconate aldolase          | 168          | 1.20         | 6         |
|          | GroEL       | Chaperonin GroEL                                                             | 168          | 0.13         | 2         |
|          | Rnr_Pfl     | Putative formate acetyltransferase                                           | 165          | 1.63         | 4         |
|          | YiiU        | Hypothetical protein                                                         | 150          | 1.01         | 2         |

|          |             |                                                                              |              |              |           |
|----------|-------------|------------------------------------------------------------------------------|--------------|--------------|-----------|
|          | GroES       | Co-chaperonin GroES                                                          | 105          | 0.92         | 4         |
|          | UshA        | Bifunctional UDP-sugar hydrolase/5'-nucleotidase                             | 89           | 0.13         | 2         |
|          | AhpC        | Alkyl hydroperoxide reductase, C22 subunit; detoxification of hydroperoxides | 70           | 0.40         | 2         |
|          | AceE        | Pyruvate dehydrogenase (decarboxylase component)                             | 59           | 0.12         | 4         |
|          | ValS        | Valyl-tRNA synthetase                                                        | 42           | 0.03         | 2         |
| <b>6</b> | DnaK        | Molecular chaperone DnaK                                                     | 4 146        | 12.67        | 32        |
|          | <b>AcnA</b> | <b>COG1048: Aconitase A</b>                                                  | <b>4 006</b> | <b>9.70</b>  | <b>39</b> |
|          | FliY        | Cystine transporter subunit                                                  | 2 271        | 20.57        | 17        |
|          | RihC        | Ribonucleoside hydrolase 3                                                   | 1 506        | 5.31         | 10        |
|          | AceA        | Isocitrate lyase                                                             | 1 415        | 4.25         | 16        |
|          | GroES       | Co-chaperonin GroES                                                          | 1 401        | 17.68        | 4         |
|          | AtoB        | Acetyl-CoA acetyltransferase                                                 | 1 234        | 3.90         | 14        |
|          | AldA        | Aldehyde dehydrogenase A, NAD-linked                                         | 1 067        | 2.96         | 15        |
|          | KdsA        | 3-deoxy-D-manno-octulosonate 8-phosphate synthase                            | 1 066        | 3.98         | 10        |
|          | SerS        | Seryl-tRNA synthetase                                                        | 1 040        | 3.40         | 15        |
|          | ValS        | Valyl-tRNA synthetase                                                        | 996          | 0.95         | 16        |
|          | PepQ        | Proline dipeptidase                                                          | 986          | 2.38         | 13        |
|          | <b>SodB</b> | <b>Superoxide dismutase, iron</b>                                            | <b>905</b>   | <b>5.17</b>  | <b>6</b>  |
|          | GrpE        | Heat shock protein                                                           | 904          | 2.66         | 6         |
|          | Rpe         | Ribulose-phosphate 3-epimerase                                               | 766          | 3.86         | 7         |
|          | GabT        | 4-aminobutyrate aminotransferase, PLP-dependent                              | 740          | 1.55         | 12        |
|          | AhpC        | Alkyl hydroperoxide reductase, C22 subunit; detoxification of hydroperoxides | 638          | 6.58         | 9         |
|          | <b>YgfK</b> | <b>Putative oxidoreductase, Fe-S subunit</b>                                 | <b>611</b>   | <b>0.64</b>  | <b>13</b> |
|          | GapA        | Glyceraldehyde-3-phosphate dehydrogenase                                     | 511          | 2.34         | 11        |
|          | <b>IlvD</b> | <b>Dihydroxyacid dehydratase</b>                                             | <b>501</b>   | <b>1.03</b>  | <b>12</b> |
|          | AstD        | Succinylglutamic semialdehyde dehydrogenase                                  | 500          | 1.10         | 8         |
|          | PflB        | Pyruvate formate lyase I                                                     | 494          | 0.73         | 15        |
|          | GadB        | Glutamate decarboxylase isozyme                                              | 473          | 0.72         | 8         |
|          | HtpG        | Heat shock protein 90                                                        | 453          | 0.75         | 12        |
|          | TktA        | Transketolase 1, thiamin-binding                                             | 439          | 0.35         | 7         |
|          | Eda         | Keto-hydroxyglutarate-aldolase/keto-deoxy-phosphogluconate aldolase          | 417          | 0.52         | 5         |
|          | SodA        | Superoxide dismutase, Mn                                                     | 411          | 1.51         | 4         |
|          | YcaC        | Predicted hydrolase                                                          | 287          | 0.84         | 3         |
|          | TdcE        | Pyruvate formate-lyase 4/2-ketobutyrate formate-lyase                        | 283          | 0.23         | 5         |
|          | IleS        | Isoleucyl-tRNA synthetase                                                    | 233          | 0.19         | 5         |
|          | CysK        | Cysteine synthase A, O-acetylserine sulfhydrylase A                          | 207          | 0.86         | 5         |
|          | Pgi         | Glucose-6-phosphate isomerase                                                | 196          | 0.34         | 5         |
|          | YgeY        | Hypothetical protein                                                         | 195          | 0.49         | 6         |
|          | FabA        | 3-hydroxydecanoyl-ACP dehydratase                                            | 186          | 2.01         | 5         |
|          | Icd         | E14 prophage; isocitrate dehydrogenase, specific for NADP+                   | 162          | 0.48         | 5         |
|          | CysE        | Serine acetyltransferase                                                     | 136          | 0.44         | 3         |
|          | GroEL       | Chaperonin GroEL                                                             | 122          | 0.29         | 5         |
|          | Tig         | Trigger factor                                                               | 116          | 0.25         | 3         |
|          | gi 83587818 | COG0281: Malic enzyme                                                        |              |              |           |
|          | gi 15803663 | Putative dehydrogenase                                                       | 91           | 0.26         | 5         |
|          | Tsf         | Elongation factor Ts                                                         | 91           | 0.42         | 3         |
|          | Adk         | Adenylate kinase                                                             | 82           | 0.16         | 2         |
|          | Mdh         | Malate dehydrogenase                                                         | 52           | 3            |           |
| <b>7</b> | GmM         | Phosphoglycerate mutase III, cofactor-independent                            | 993          | 3.10         | 14        |
|          | <b>Bfr</b>  | <b>Bacterioferritin</b>                                                      | <b>959</b>   | <b>19.60</b> | <b>10</b> |
|          | HhA         | Hsp31 molecular chaperone                                                    | 695          | 2.92         | 9         |
|          | AhpC        | Alkyl hydroperoxide reductase, C22 subunit; detoxification of hydroperoxides | 657          | 4.41         | 7         |

|          |             |                                                                                     |              |             |                       |
|----------|-------------|-------------------------------------------------------------------------------------|--------------|-------------|-----------------------|
|          | Fbp         | Fructose-bisphosphate aldolase                                                      | 598          | 1.72        | 7                     |
|          | TreC        | Trehalose-6-P hydrolase                                                             | 571          | 0.86        | 10                    |
|          | KdsA        | 3-deoxy-D-manno-octulosonate 8-phosphate synthase                                   | 434          | 1.23        | 5                     |
|          | Rnr_Pfl     | Putative formate acetyltransferase                                                  | 423          | 3.27        | 4                     |
|          | GapA        | Glyceraldehyde-3-phosphate dehydrogenase                                            | 361          | 0.65        | 5                     |
|          | RpiA        | Ribose-5-phosphate isomerase A                                                      | 329          | 1.95        | 6                     |
|          | gi 75212202 | COG0251: Putative translation initiation inhibitor, yjgF family                     | 320          | 2.54        | 5                     |
|          | Ddl         | D-alanylalanine synthetase                                                          | 315          | 0.89        | 6                     |
|          | TrxB        | Thioredoxin reductase                                                               | 285          | 1.05        | 6                     |
|          | YgeY        | Hypothetical protein                                                                | 249          | 0.49        | 4                     |
|          | <b>AcnA</b> | <b>Aconitase A</b>                                                                  | <b>228</b>   | <b>0.12</b> | <b>3</b>              |
|          | YbiB        | Predicted transferase/phosphorylase                                                 | 211          | 0.66        | 5                     |
|          | Pgi         | Glucose-6-phosphate isomerase                                                       | 190          | 0.26        | 3                     |
|          | RihC        | Ribonucleoside hydrolase 3                                                          | 182          | 0.38        | 2                     |
|          | Adk         | Adenylate kinase                                                                    | 180          | 1.11        | 5                     |
|          | CheY        | Chemotaxis regulator transmits chemoreceptor signals to flagellar motor components  | 176          | 1.09        | 2                     |
|          | Cmk         | Cytidylate kinase                                                                   | 166          | 0.77        | 4                     |
|          | PpiB        | Peptidyl-prolyl cis-trans isomerase B (rotamase B)                                  |              |             |                       |
|          | Rpe         | Ribulose-phosphate 3-epimerase                                                      | 157          | 0.78        | 3                     |
|          | PepE        | Peptidase E                                                                         | 136          | 0.54        | 3                     |
|          | NfsB        | Nitroreductase A, NADPH-dependent, FMN-dependent                                    | 135          | 0.48        | 3                     |
|          | DprA        | Dihydropteridine reductase, NAD(P)H-dependent, oxygen-insensitive                   | 124          | 0.34        | 2                     |
|          | gi 75227401 | COG0663: Carbonic anhydrases/acetyltransferases, isoleucine patch superfamily       | 121          | 0.41        | 2                     |
|          | FliY        | Cystine transporter subunit                                                         | 115          | 0.28        | 2                     |
|          | DnaK        | Molecular chaperone DnaK                                                            |              |             |                       |
|          | GltX        | Glutamyl-tRNA synthetase                                                            | 100          | 0.14        | 2                     |
|          | <b>SodB</b> | <b>Superoxide dismutase, iron</b>                                                   | <b>99</b>    | <b>0.39</b> | <b>2</b>              |
|          | PepQ        | Proline dipeptidase                                                                 | 96           | 0.15        | 2                     |
|          | Tig         | Trigger factor                                                                      | 91           | 0.16        | 2                     |
|          | Pgk         | Phosphoglycerate kinase                                                             | 82           | 0.19        | 2                     |
|          | Tsf         | Elongation factor Ts                                                                | 80           | 0.26        | 2                     |
|          | <b>YgfK</b> | <b>Putative oxidoreductase, Fe-S subunit</b>                                        | <b>80</b>    | <b>0.06</b> | <b>2</b>              |
|          | Apt         | Adenine phosphoribosyltransferase                                                   | 70           | 0.42        | 2                     |
|          | TiaE        | 2-keto-D-gluconate reductase                                                        | 68           | 0.35        | 3                     |
|          | PhnA        | Hypothetical protein                                                                | 64           | 0.72        | 2                     |
|          | Eno         | Phosphopyruvate hydratase                                                           | 63           | 0.17        | 2                     |
|          | PrIC        | Oligopeptidase A                                                                    | 61           | 0.10        | 2                     |
|          | YcaR        | Hypothetical protein                                                                | 50           | 1.55        | 2                     |
| <b>8</b> | Mdh         | Malate dehydrogenase                                                                | 2 456        | 16.35       | 16                    |
|          | DapD        | 2,3,4,5-tetrahydropyridine-2-carboxylate N-succinyltransferase                      | 1 208        | 11.03       | 14                    |
|          | <b>FumB</b> | <b>Fumarase B</b>                                                                   | <b>1 187</b> | <b>3.71</b> | <b>21<sup>d</sup></b> |
|          | <b>FumA</b> | <b>Fumarase A</b>                                                                   | <b>839</b>   | <b>1.59</b> | <b>14<sup>d</sup></b> |
|          | DnaK        | Molecular chaperone DnaK                                                            | 767          | 2.00        | 17                    |
|          | SerS        | Seryl-tRNA synthetase                                                               | 584          | 2.04        | 11                    |
|          | <b>NrfA</b> | <b>Periplasmic nitrite reductase</b>                                                | <b>509</b>   | <b>1.37</b> | <b>9</b>              |
|          | FusA        | Elongation factor EF-2                                                              | 437          | 0.75        | 9                     |
|          | GlcB        | Malate synthase G                                                                   | 433          | 0.71        | 11                    |
|          | AspA        | Aspartate ammonia-lyase                                                             | 415          | 1.11        | 9                     |
|          | IleS        | Isoleucyl-tRNA synthetase                                                           | 399          | 0.51        | 11                    |
|          | purH        | Fused IMP cyclohydrolase/phospho-ribosylaminoimidazolecarboxamide formyltransferase | 367          | 0.87        | 9                     |
|          | Eno         | Phosphopyruvate hydratase                                                           | 341          | 1.03        | 7                     |
|          | AceE        | Pyruvate dehydrogenase (decarboxylase component)                                    | 329          | 0.39        | 9                     |

|                                                  |             |                                                                          |            |             |                       |
|--------------------------------------------------|-------------|--------------------------------------------------------------------------|------------|-------------|-----------------------|
|                                                  | LysS        | Lysyl-tRNA synthetase                                                    | 315        | 0.75        | 8                     |
|                                                  | HtpG        | Heat shock protein 90                                                    | 268        | 0.36        | 6                     |
|                                                  | ValS        | Valyl-tRNA synthetase                                                    | 243        | 0.26        | 6                     |
|                                                  | GroEL       | Chaperonin GroEL                                                         | 238        | 0.46        | 6                     |
|                                                  | FabI        | Enoyl-(acyl carrier protein) reductase                                   | 231        | 1.43        | 6                     |
|                                                  | MglB        | Methyl-galactoside transporter subunit                                   | 224        | 0.82        | 5                     |
|                                                  | GrpE        | Heat shock protein                                                       | 212        | 0.63        | 2                     |
|                                                  | Zwf         | Glucose-6-phosphate dehydrogenase                                        | 208        | 0.47        | 6                     |
|                                                  | PdxB        | Erythronate-4-phosphate dehydrogenase                                    | 204        | 0.68        | 6                     |
|                                                  | YceI        | Hypothetical protein                                                     | 204        | 0.96        | 4                     |
|                                                  | <b>YgfK</b> | <b>Putative oxidoreductase, Fe-S subunit</b>                             | <b>203</b> | <b>0.24</b> | <b>7</b>              |
|                                                  | GshB        | Glutathione synthetase                                                   | 193        | 0.49        | 4                     |
|                                                  | LysS        | Lysine tRNA synthetase, constitutive                                     | 180        | 0.46        | 5                     |
|                                                  | OsmY        | Periplasmic protein                                                      | 161        | 0.65        | 3                     |
|                                                  | NrdA        | Ribonucleoside diphosphate reductase 1, alpha subunit                    | 148        | 0.18        | 4                     |
|                                                  | RbsD        | Membrane-associated component of D-ribose high-affinity transport system | 145        | 0.97        | 2                     |
|                                                  | YebB        | Hypothetical protein                                                     | 145        | 0.89        | 5                     |
|                                                  | Agp         | Glucose-1-phosphatase/inositol phosphatase                               | 142        | 0.26        | 2                     |
|                                                  | TdcE        | Keto acid formate-lyase                                                  | 140        | 0.36        | 5                     |
|                                                  | PflB        | Pyruvate formate lyase I                                                 | 121        | 0.14        | 3                     |
|                                                  | InfB        | Translation initiation factor IF-2                                       | 116        | 0.08        | 2                     |
|                                                  | MalE        | Periplasmic maltose-binding protein                                      | 113        | 0.28        | 3                     |
|                                                  | Tdh         | Threonine 3-dehydrogenase, NAD(P)-binding                                | 108        | 0.33        | 3                     |
|                                                  | ThrS        | Threonyl-tRNA synthetase                                                 | 103        | 0.21        | 4                     |
|                                                  | TktA        | Transketolase 1, thiamin-binding                                         | 100        | 0.11        | 2                     |
|                                                  | GltA        | Citrate synthase                                                         | 94         | 0.16        | 2                     |
|                                                  | gi 15832709 | Heat shock protein                                                       | 69         | 0.08        | 2                     |
|                                                  | FliC        | Flagellar filament structural protein (flagellin)                        | 63         | 0.15        | 2                     |
|                                                  | PanC        | Pantothenate synthetase                                                  | 57         | 0.25        | 2                     |
| d FumA has 9 unique peptides in common with FumB |             |                                                                          |            |             |                       |
| <b>9</b>                                         | FabI        | Enoyl-(acyl carrier protein) reductase                                   | 1 500      | 17.40       | 14                    |
|                                                  | <b>FumB</b> | <b>Fumarase B</b>                                                        | <b>951</b> | <b>1.92</b> | <b>16<sup>d</sup></b> |
|                                                  | Mdh         | Malate dehydrogenase                                                     | 888        | 6.21        | 14                    |
|                                                  | YebB        | Hypothetical protein                                                     | 847        | 5.05        | 11                    |
|                                                  | DapD        | 2,3,4,5-tetrahydropyridine-2-carboxylate N-succinyltransferase           | 790        | 3.66        | 9                     |
|                                                  | MglB        | Methyl-galactoside transporter subunit                                   | 539        | 2.01        | 10                    |
|                                                  | <b>FumA</b> | <b>Fumarase A</b>                                                        | <b>482</b> | <b>0.61</b> | <b>8<sup>d</sup></b>  |
|                                                  | AspA        | Aspartate ammonia-lyase                                                  | 438        | 1.11        | 10                    |
|                                                  | DnaK        | Molecular chaperone DnaK                                                 | 407        | 0.60        | 8                     |
|                                                  | GrpE        | Heat shock protein                                                       | 281        | 1.35        | 4                     |
|                                                  | IleS        | Isoleucyl-tRNA synthetase                                                | 277        | 0.27        | 7                     |
|                                                  | <b>NrfA</b> | <b>Periplasmic nitrite reductase</b>                                     | <b>265</b> | <b>0.30</b> | <b>4</b>              |
|                                                  | ValS        | Valyl-tRNA synthetase                                                    | 211        | 0.18        | 4                     |
|                                                  | FusA        | Elongation factor EF-2                                                   | 209        | 0.26        | 5                     |
|                                                  | Eno         | Phosphopyruvate hydratase                                                | 187        | 0.37        | 4                     |
|                                                  | Agp         | Glucose-1-phosphatase/inositol                                           | 172        | 0.26        | 2                     |
|                                                  | HtpG        | Heat shock protein 90                                                    | 164        | 0.22        | 4                     |
|                                                  | TktA        | Transketolase 1, thiamin-binding                                         | 161        | 0.22        | 4                     |
|                                                  | LysS        | Lysyl-tRNA synthetase                                                    | 160        | 0.45        | 6                     |
|                                                  | PdxB        | Erythronate-4-phosphate dehydrogenase                                    | 155        | 0.4         | 5                     |
|                                                  | SerS        | Seryl-tRNA synthetase                                                    | 152        | 0.34        | 4                     |
|                                                  | LysS        | Lysine tRNA synthetase, constitutive                                     | 141        | 0.37        | 5                     |
|                                                  | KdsA        | 3-deoxy-D-manno-octulosonate 8-phosphate synthase                        | 125        | 0.41        | 2                     |
|                                                  | TdcE        | Keto acid formate-lyase                                                  | 123        | 0.20        | 3                     |
|                                                  | PanC        | Pantothenate synthetase                                                  | 117        | 0.25        | 2                     |
|                                                  | GapA        | Glyceraldehyde-3-phosphate dehydrogenase                                 | 114        | 0.22        | 2                     |
|                                                  | <b>AcnA</b> | <b>Aconitase A</b>                                                       | <b>107</b> | <b>0.04</b> | <b>1</b>              |
|                                                  | GrxC        | Glutaredoxin 3                                                           | 98         | 1.95        | 3                     |

|                                                  |             |                                                                                       |            |             |                       |
|--------------------------------------------------|-------------|---------------------------------------------------------------------------------------|------------|-------------|-----------------------|
|                                                  | GroEL       | Chaperonin GroEL                                                                      | 93         | 0.13        | 2                     |
|                                                  | <b>SodB</b> | <b>Superoxide dismutase, iron</b>                                                     | <b>89</b>  | <b>0.18</b> | <b>1</b>              |
|                                                  | Zwf         | Glucose-6-phosphate dehydrogenase                                                     | 86         | 0.21        | 3                     |
|                                                  | RbsB        | D-ribose transporter subunit                                                          | 84         | 0.26        | 2                     |
|                                                  | PflB        | Pyruvate formate lyase I                                                              | 81         | 0.14        | 3                     |
|                                                  | SucC        | Succinyl-CoA synthetase subunit beta                                                  | 66         | 0.09        | 1                     |
|                                                  | gi 15832709 | Heat shock protein                                                                    | 66         | 0.08        | 2                     |
|                                                  | AceE        | Pyruvate dehydrogenase (decarboxylase component)                                      | 52         | 0.04        | 1                     |
|                                                  | ThrS        | Threonyl-tRNA synthetase                                                              | 51         | 0.10        | 2                     |
| d FumA has 6 unique peptides in common with FumB |             |                                                                                       |            |             |                       |
| <b>10</b>                                        | AspA        | Aspartate ammonia-lyase                                                               | 2 862      | 9.83        | 20                    |
|                                                  | MglB        | Methyl-galactoside transporter subunit                                                | 2 462      | 32.23       | 21                    |
|                                                  | FabI        | Enoyl-(acyl carrier protein) reductase                                                | 1 423      | 15.21       | 15                    |
|                                                  | <b>FumB</b> | <b>Fumarase B</b>                                                                     | <b>932</b> | <b>1.59</b> | <b>13<sup>d</sup></b> |
|                                                  | PflB        | Pyruvate formate lyase I                                                              | 783        | 1.05        | 16                    |
|                                                  | GcvP        | Glycine decarboxylase, PLP-dependent, subunit (protein P) of glycine cleavage complex | 782        | 0.62        | 13                    |
|                                                  | <b>FumA</b> | <b>Fumarase A</b>                                                                     | <b>638</b> | <b>0.92</b> | <b>10<sup>d</sup></b> |
|                                                  | TktB        | Transketolase 2, thiamin-binding                                                      | 612        | 0.72        | 10                    |
|                                                  | TktA        | Transketolase 1, thiamin-binding                                                      | 568        | 0.73        | 11                    |
|                                                  | AceE        | Pyruvate dehydrogenase (decarboxylase component)                                      | 498        | 0.49        | 9                     |
|                                                  | TdcE        | Pyruvate formate-lyase 4/2-ketobutyrate formate-lyase                                 | 436        | 0.52        | 10                    |
|                                                  | AldA        | Aldehyde dehydrogenase A, NAD-linked                                                  | 422        | 0.73        | 6                     |
|                                                  | DapD        | 2,3,4,5-tetrahydropyridine-2-carboxylate N-succinyltransferase                        | 421        | 2.27        | 8                     |
|                                                  | PdxB        | Erythronate-4-phosphate dehydrogenase                                                 | 406        | 0.99        | 8                     |
|                                                  | DsbC        | Protein disulfide isomerase II                                                        | 393        | 2.00        | 6                     |
|                                                  | gi 15832709 | Heat shock protein                                                                    | 342        | 0.30        | 6                     |
|                                                  | GapA        | Glyceraldehyde-3-phosphate dehydrogenase                                              | 276        | 0.695       | 4                     |
|                                                  | YebB        | Hypothetical protein                                                                  | 214        | 0.37        | 3                     |
|                                                  | <b>YgfN</b> | <b>Xanthine dehydrogenase like protein, Mo and FeS containing subunit</b>             | <b>204</b> | <b>0.11</b> | <b>3</b>              |
|                                                  | Udp         | Uridine phosphorylase                                                                 | 202        | 0.48        | 2                     |
|                                                  | DnaK        | Molecular chaperone DnaK                                                              | 198        | 0.17        | 3                     |
|                                                  | GrxC        | Glutaredoxin 3                                                                        | 198        | 3.23        | 3                     |
|                                                  | <b>KatG</b> | <b>Catalase/hydroperoxidase HPI(I)</b>                                                | <b>186</b> | <b>0.31</b> | <b>6</b>              |
|                                                  | FtsP        | Repressor protein for FtsI                                                            | 178        | 0.32        | 4                     |
|                                                  | YiiU        | Hypothetical protein                                                                  | 164        | 1.01        | 2                     |
|                                                  | gi 75177918 | COG3013: Uncharacterized conserved protein                                            | 164        | 1.04        | 3                     |
|                                                  | Mdh         | Malate dehydrogenase                                                                  | 155        | 0.25        | 2                     |
|                                                  | KdsA        | 3-deoxy-D-manno-octulosonate 8-phosphate synthase                                     | 139        | 0.26        | 2                     |
|                                                  | NagA        | N-acetylglucosamine-6-phosphate deacetylase                                           | 135        | 0.19        | 2                     |
|                                                  | <b>AcnA</b> | <b>Aconitase A</b>                                                                    | <b>77</b>  | <b>0.04</b> | <b>1</b>              |
|                                                  | ModA        | Molybdate transporter subunit                                                         | 70         | 0.30        | 2                     |
|                                                  | SucC        | Succinyl-CoA synthetase subunit beta                                                  | 45         | 0.09        | 1                     |
|                                                  | SucD        | Succinyl-CoA synthetase alpha subunit                                                 | 40         | 0.13        | 1                     |
| d FumA has 7 unique peptides in common with FumB |             |                                                                                       |            |             |                       |
| <b>11</b>                                        | ThrS        | Threonyl-tRNA synthetase                                                              | 1 153      | 2.88        | 22                    |
|                                                  | Mdh         | Malate dehydrogenase                                                                  | 857        | 3.65        | 9                     |
|                                                  | <b>YgfN</b> | <b>Xanthine dehydrogenase like protein, Mo and FeS containing subunit</b>             | <b>501</b> | <b>0.75</b> | <b>13</b>             |
|                                                  | <b>YgfK</b> | <b>Putative oxidoreductase, Fe-S subunit</b>                                          | <b>453</b> | <b>0.59</b> | <b>14</b>             |
|                                                  | gi 83585805 | COG1185: Polyribonucleotide nucleotidyltransferase (polynucleotide phosphorylase)     | 450        | 0.93        | 11                    |
|                                                  | gi 75177918 | COG3013: Uncharacterized conserved protein                                            | 372        | 4.00        | 7                     |
|                                                  | PflB        | Pyruvate formate lyase I                                                              | 365        | 0.59        | 10                    |

|           |             |                                                                                       |              |             |           |
|-----------|-------------|---------------------------------------------------------------------------------------|--------------|-------------|-----------|
|           | gi 15832709 | Heat shock protein                                                                    | 268          | 0.30        | 6         |
|           | AspA        | Aspartate ammonia-lyase                                                               | 260          | 0.61        | 6         |
|           | Eco         | Ecotin, a serine protease inhibitor                                                   | 253          | 2.81        | 5         |
|           | GcvP        | Glycine decarboxylase, PLP-dependent, subunit (protein P) of glycine cleavage complex | 236          | 0.32        | 7         |
|           | YgfM        | Predicted oxidoreductase; possible component of selenate reductase                    | 175          | 0.85        | 5         |
|           | PepT        | Peptidase T                                                                           | 171          | 0.37        | 4         |
|           | YicC        | Hypothetical protein                                                                  | 149          | 0.54        | 4         |
|           | PheA        | Chorismate mutase-P                                                                   | 128          | 0.39        | 4         |
|           | Prr         | Medium chain aldehyde dehydrogenase                                                   | 125          | 0.33        | 3         |
|           | gi 15803317 | Hypothetical protein                                                                  | 111          | 0.15        | 2         |
|           | AspS        | Aspartyl-tRNA synthetase                                                              | 94           | 0.12        | 2         |
|           | BetB        | Betaine aldehyde dehydrogenase, NAD-dependent                                         | 91           | 0.15        | 2         |
|           | SucC        | Succinyl-CoA synthetase subunit beta                                                  | 91           | 0.19        | 2         |
|           | GltA        | citrate synthase                                                                      | 88           | 0.16        | 2         |
|           | SucD        | Succinyl-CoA synthetase alpha subunit                                                 | 72           | 0.27        | 2         |
|           | LsrB        | A12 transporter                                                                       | 66           | 0.22        | 2         |
|           | IadA        | Isoaspartyl dipeptidase                                                               | 64           | 0.19        | 2         |
|           | KdsD        | D-arabinose 5-phosphate                                                               | 63           | 0.22        | 2         |
|           | TdcE        | Keto acid formate-lyase                                                               | 57           | 0.13        | 2         |
|           | MenB        | Dihydroxynaphthoic acid synthetase                                                    | 55           | 0.25        | 2         |
| <b>12</b> | <b>YgfN</b> | <b>Xanthine dehydrogenase like protein, Mo and FeS containing subunit</b>             | <b>1 309</b> | <b>1.65</b> | <b>20</b> |
|           | GcvP        | Glycine decarboxylase, PLP-dependent, subunit (protein P) of glycine cleavage complex | 1 256        | 1.46        | 18        |
|           | gi 83585805 | COG1185: Polyribonucleotide nucleotidyltransferase (polynucleotide phosphorylase)     | 1 192        | 2.55        | 19        |
|           | ThrS        | Threonyl-tRNA synthetase                                                              | 1 143        | 2.70        | 25        |
|           | gi 83587769 | COG3131: Periplasmic glucans biosynthesis protein                                     | 916          | 2.30        | 14        |
|           | PflB        | Pyruvate formate lyase I                                                              | 873          | 1.43        | 21        |
|           | Prr         | Medium chain aldehyde dehydrogenase                                                   | 728          | 0.76        | 5         |
|           | OsmY        | Periplasmic protein                                                                   | 728          | 3.50        | 7         |
|           | SucC        | Succinyl-CoA synthetase subunit beta                                                  | 661          | 2.07        | 9         |
|           | AspA        | Aspartate ammonia-lyase                                                               | 522          | 1.42        | 11        |
|           | YicC        | Hypothetical protein                                                                  | 516          | 1.37        | 6         |
|           | gi 15832709 | Heat shock protein                                                                    | 516          | 0.46        | 9         |
|           | YgfM        | Predicted oxidoreductase; possible component of selenate reductase                    | 496          | 1.68        | 7         |
|           | AspS        | aspartyl-tRNA synthetase                                                              | 394          | 0.47        | 7         |
|           | FumC        | Fumarase C                                                                            | 363          | 0.64        | 6         |
|           | gi 15803317 | Hypothetical protein                                                                  | 357          | 0.52        | 5         |
|           | KdsD        | D-arabinose 5-phosphate isomerase                                                     | 225          | 0.83        | 6         |
|           | GroES       | Co-chaperonin GroES                                                                   | 210          | 1.65        | 2         |
|           | GapA        | Glyceraldehyde-3-phosphate dehydrogenase                                              | 202          | 0.49        | 4         |
|           | OppA        | Oligopeptide transporter subunit                                                      | 194          | 0.27        | 3         |
|           | PurB        | adenylosuccinate lyase                                                                | 188          | 0.52        | 5         |
|           | SucD        | Succinyl-CoA synthetase alpha subunit                                                 | 183          | 1.04        | 6         |
|           | ModA        | Molybdate transporter subunit                                                         | 170          | 0.92        | 5         |
|           | PanC        | Pantothenate synthetase                                                               | 163          | 0.57        | 4         |
|           | <b>YgfK</b> | <b>Putative oxidoreductase, Fe-S subunit</b>                                          | <b>153</b>   | <b>0.10</b> | <b>3</b>  |
|           | GltA        | citrate synthase                                                                      | 143          | 0.35        | 3         |
|           | BetB        | Betaine aldehyde dehydrogenase, NAD-dependent                                         | 138          | 0.15        | 2         |
|           | SerA        | D-3-phosphoglycerate dehydrogenase                                                    | 137          | 0.27        | 3         |
|           | PdxJ        | Pyridoxal phosphate biosynthetic protein                                              | 121          | 0.31        | 2         |
|           | UshA        | Bifunctional UDP-sugar hydrolase/5'-nucleotidase                                      | 120          | 0.13        | 2         |
|           | Dcd         | 2'-deoxycytidine 5'-triphosphate deaminase                                            | 109          | 0.64        | 3         |



|           |             |                                                                  |            |             |          |
|-----------|-------------|------------------------------------------------------------------|------------|-------------|----------|
|           | PepT        | Peptidase T                                                      | 88         | 0.17        | 2        |
|           | TdcE        | Pyruvate formate-lyase 4/2-ketobutyrate formate-lyase            | 71         | 0.13        | 3        |
|           | AppA        | Phosphoanhydride phosphorylase                                   | 56         | 0.16        | 2        |
| <b>13</b> | gi 1658028  | Dehydrin                                                         | 387        | 1.40        | 10       |
|           | <b>Bfr</b>  | <b>Bacterioferritin</b>                                          | <b>364</b> | <b>7</b>    | <b>9</b> |
|           | Mdh         | Malate dehydrogenase                                             | 334        | 0.55        | 4        |
|           | RbsB        | D-ribose transporter subunit                                     | 280        | 1.82        | 8        |
|           | <b>Ftn</b>  | <b>Ferritin</b>                                                  | <b>195</b> | <b>1.96</b> | <b>5</b> |
|           | XdhA        | Xanthine dehydrogenase, molybdenum binding subunit               | 145        | 0.25        | 5        |
|           | YajQ        | Hypothetical protein                                             | 127        | 0.74        | 2        |
|           | XdhB        | Xanthine dehydrogenase, FAD-binding subunit                      | 116        | 0.25        | 2        |
|           | Frr         | Ribosome releasing factor                                        | 95         | 0.41        | 2        |
|           | AphA        | Acid phosphatase/phosphotransferase, class B, non-specific       | 87         | 0.31        | 2        |
|           | YnjE        | Predicted thiosulfate sulfur transferase                         | 82         | 0.16        | 2        |
|           | YghZ        | Aldo-keto reductase                                              | 81         | 0.20        | 2        |
|           | AccD        | Acetyl-CoA carboxylase beta subunit                              | 75         | 0.24        | 2        |
|           | GroEL       | Chaperonin GroEL                                                 | 67         | 0.13        | 2        |
|           | AccA        | Acetyl-CoA carboxylase alpha subunit                             | 55         | 0.22        | 2        |
| <b>14</b> | Mdh         | Malate dehydrogenase                                             | 238        | 0.55        | 4        |
|           | <b>Ftn</b>  | <b>Ferritin</b>                                                  | <b>171</b> | <b>1.06</b> | <b>3</b> |
|           | YajQ        | Hypothetical protein                                             | 126        | 0.74        | 2        |
|           | AphA        | Acid phosphatase/phosphotransferase, class B, non-specific       | 120        | 0.50        | 2        |
|           | CspC        | Cold shock protein                                               | 83         | 1.43        | 2        |
|           | <b>Bfr</b>  | <b>Bacterioferritin</b>                                          | <b>67</b>  | <b>0.46</b> | <b>2</b> |
| <b>15</b> | Mdh         | Malate dehydrogenase                                             | 481        | 0.73        | 5        |
|           | SucB        | Dihydrolipoamide acetyltransferase                               | 297        | 0.77        | 7        |
|           | <b>Ftn</b>  | <b>Ferritin</b>                                                  | <b>238</b> | <b>1.96</b> | <b>5</b> |
|           | <b>KatG</b> | <b>Catalase/hydroperoxidase HPI(I)</b>                           | <b>184</b> | <b>0.31</b> | <b>7</b> |
|           | AceF        | Pyruvate dehydrogenase, dihydrolipoyltransacetylase component E2 | 171        | 0.39        | 6        |
|           | LacZ        | Beta-D-galactosidase                                             | 107        | 0.26        | 3        |
|           | RbsB        | D-ribose transporter subunit                                     | 107        | 0.26        | 2        |
|           | HtrA        | Periplasmic serine protease Do; heat shock protein HtrA          | 63         | 0.16        | 3        |
|           | GlnH        | Glutamine ABC transporter periplasmic-binding protein            | 61         | 0.30        | 2        |
|           | Eno         | Phosphopyruvate hydratase                                        | 60         | 0.17        | 2        |
|           | YrbC        | Predicted ABC-type organic solvent transporter                   | 44         | 0.34        | 2        |

<sup>a</sup>Genes from Database *E. coli* K12 genome (www.ecocyc.com); <sup>b</sup>Mascot identity threshold  $p < 0.05$ . Spot numbers correspond to numbered positions in Fig. 1A; <sup>c</sup>emPAI is a measure for the relative abundance of proteins in a spot; <sup>d</sup>Unique peptides that were detected occur in both FumA and FumB and cannot be unambiguously assigned to either one of them. They have now been assigned to both FumA and FumB.

The position of spot number is indicated in Fig. S1B. This table contains just proteins with number of unique peptides  $\geq 2$ .

**Figure S2** Coomassie brilliant blue (CBB) stained gels of native–native 2D–PAGE of soluble protein extract ( $\mu\text{g}$  protein) obtained from *E. coli* (575  $\mu\text{g}$ ) after growth on high iron. **A** without DNase; **B** with 0.1 mg/L DNase and 0.1 mg/L RNase.

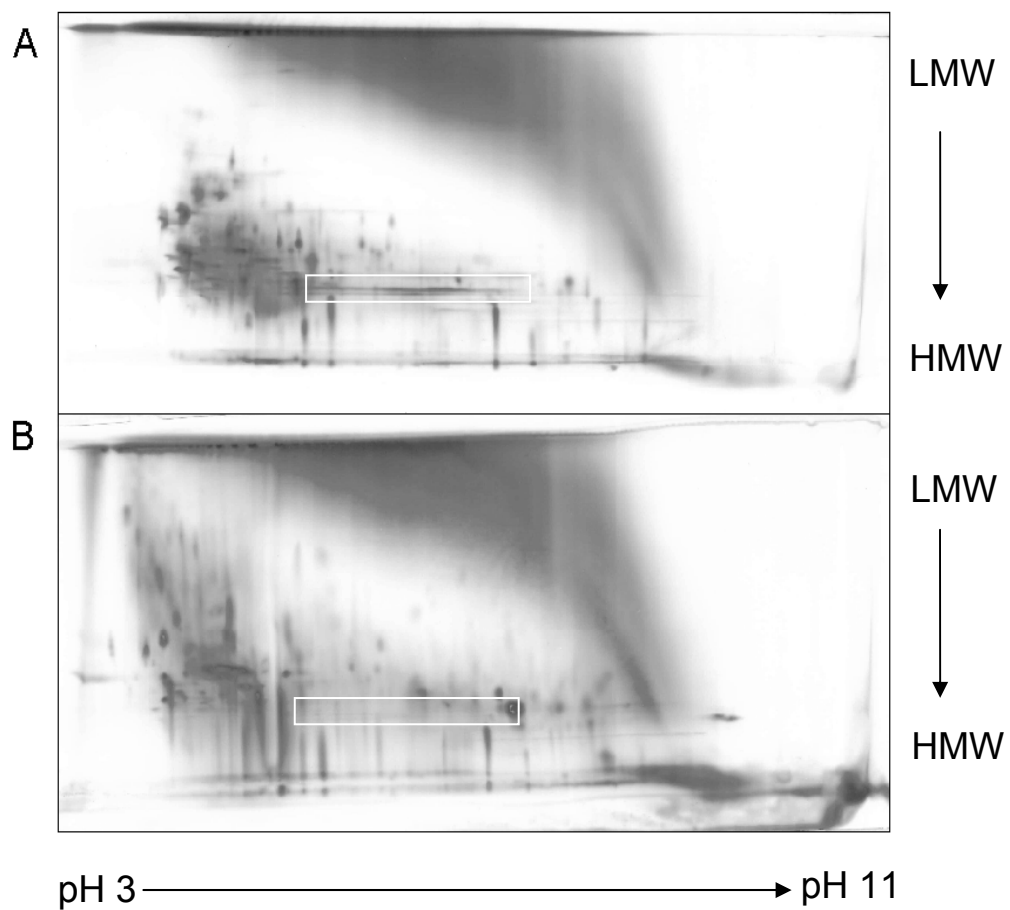

**Figure S3** Autoradiogram of native 2D-PAGE of soluble protein extract of *E. coli* grown on 0.24 mM  $^{69m}\text{Zn}$ . The spot positions are indicated with numbers.

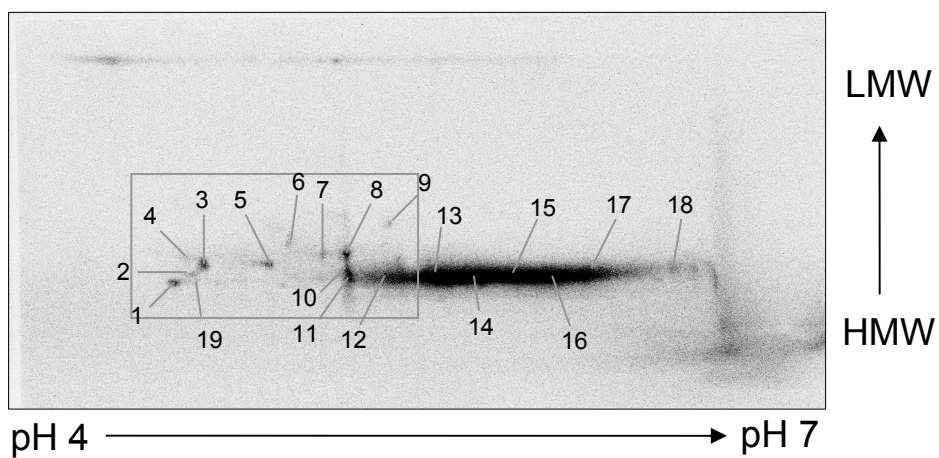

**Table S3** Protein identification by LC MS/MS after native–native 2D–PAGE separation of *E. coli* soluble protein extract obtained from growth in LB medium containing 0.24 mM <sup>69m</sup>ZnCl<sub>2</sub>. The predicted Zn-containing proteins according to the gene ontology database of *E. coli* ([www.ecocyc.org](http://www.ecocyc.org)) are in bold.

| Spot #      | Gene        | Protein                                                        | Mascot protein score              | emPAI       | Unique peptides |           |
|-------------|-------------|----------------------------------------------------------------|-----------------------------------|-------------|-----------------|-----------|
| <b>1</b>    | FliC        | Flagellar filament structural protein (flagellin)              | 1183                              | 3.37        | 18              |           |
|             | YcaC        | Predicted hydrolase                                            | 1010                              | 3.59        | 9               |           |
|             | GadB        | Glutamate decarboxylase isozyme                                | 866                               | 1.96        | 14              |           |
|             | LysS        | lysyl–tRNA synthetase                                          | 252                               | 0.55        | 7               |           |
|             | <b>DnaK</b> | <b>Molecular chaperone DnaK</b>                                | <b>224</b>                        | <b>0.30</b> | <b>5</b>        |           |
|             | Tig         | trigger factor                                                 | 164                               | 0.25        | 3               |           |
|             | SerS        | seryl–tRNA synthetase                                          | 161                               | 0.34        | 4               |           |
|             | DapA        | Dihydrodipicolinate synthase                                   | 149                               | 0.57        | 4               |           |
|             | Gnd         | gluconate–6–phosphate dehydrogenase, decarboxylating           | 128                               | 0.23        | 3               |           |
|             | WrbA        | Predicted flavoprotein in Trp regulation                       | 104                               | 0.40        | 2               |           |
|             | PflD        | Putative formate acetyltransferase                             | 98                                | 0.62        | 3               |           |
|             | AdiA        | Biodegradative arginine decarboxylase (ADC)                    | 95                                | 0.14        | 3               |           |
|             | GroEL       | Chaperonin GroEL                                               | 94                                | 0.13        | 2               |           |
|             | GroES       | Co–chaperonin GroES                                            | 84                                | 1.65        | 3               |           |
|             | Eno         | Phosphopyruvate hydratase                                      | 82                                | 0.17        | 2               |           |
|             | FusA        | Elongation factor EF–2                                         | 77                                | 0.15        | 3               |           |
|             | <b>2</b>    | <b>UxaC</b>                                                    | <b>Uronate isomerase</b>          | <b>5829</b> | <b>45.75</b>    | <b>38</b> |
| GadB        |             | Glutamate decarboxylase isozyme                                | 1334                              | 2.88        | 15              |           |
| FliC        |             | Flagellin                                                      | 960                               | 1.67        | 11              |           |
| WrbA        |             | Predicted flavoprotein in Trp regulation                       | 697                               | 7.97        | 11              |           |
| Gnd         |             | Gluconate–6–phosphate dehydrogenase, decarboxylating           | 573                               | 1.01        | 9               |           |
| PckA        |             | Phosphoenolpyruvate carboxykinase                              | 502                               | 0.72        | 9               |           |
| SodB        |             | Superoxide dismutase, iron                                     | 449                               | 3.43        | 7               |           |
| TalB        |             | Transaldolase                                                  | 362                               | 1.03        | 7               |           |
| AspC        |             | Aspartate transaminase                                         | 324                               | 0.93        | 8               |           |
| NlpB        |             | Lipoprotein 34 precursor                                       | 273                               | 0.63        | 4               |           |
| YcaC        |             | Predicted hydrolase                                            | 181                               | 0.36        | 2               |           |
| LdhA        |             | D–lactate dehydrogenase                                        | 175                               | 0.34        | 3               |           |
| YhfA        |             | Hypothetical protein b3356                                     | 133                               | 0.61        | 2               |           |
| GroEL       |             | Chaperonin groEL                                               | 124                               | 0.13        | 2               |           |
| RpsA        |             | Ribosomal protein S1                                           | 123                               | 0.19        | 3               |           |
| DapA        |             | Dihydrodipicolinate synthase                                   | 120                               | 0.25        | 2               |           |
| GlpQ        |             | Glycerophosphodiester phosphodiesterase precursor, periplasmic | 118                               | 0.30        | 3               |           |
| Moab        |             | Molybdopterin biosynthesis, protein B                          | 104                               | 0.75        | 3               |           |
| <b>3</b>    |             | SodB                                                           | Superoxide dismutase, iron        | 2738        | 7.58            | 8         |
|             |             | PckA                                                           | Phosphoenolpyruvate carboxykinase | 1212        | 1.96            | 15        |
|             | GlpQ        | Glycerophosphodiester phosphodiesterase precursor, periplasmic | 400                               | 0.55        | 5               |           |
|             | Gnd         | Gluconate–6–phosphate dehydrogenase, decarboxylating           | 387                               | 0.63        | 6               |           |
|             | Gor         | Glutathione–disulfide reductase                                | 341                               | 0.55        | 6               |           |
|             | TalB        | Transaldolase                                                  | 322                               | 0.66        | 5               |           |
|             | CysK        | Cysteine synthase A                                            | 302                               | 0.68        | 5               |           |
|             | <b>AckA</b> | <b>Acetate kinase</b>                                          | <b>284</b>                        | <b>0.51</b> | <b>5</b>        |           |
|             | AhpC        | Alkyl hydroperoxide reductase C22 subunit                      | 269                               | 1.33        | 5               |           |
|             | WrbA        | Predicted flavoprotein in Trp regulation                       | 180                               | 0.96        | 4               |           |
|             | <b>YcdX</b> | <b>Predicted zinc–binding hydrolase</b>                        | <b>176</b>                        | <b>0.48</b> | <b>3</b>        |           |
|             | HdhA        | 7 alpha–hydroxysteroid dehydrogenase                           | 153                               | 0.48        | 3               |           |
|             | GmhA        | Phosphoheptose isomerase                                       | 104                               | 0.40        | 2               |           |
|             | <b>4</b>    | SodB                                                           | Superoxide dismutase, iron        | 2579        | 6.28            | 7         |
| <b>YgeY</b> |             | <b>Probable deacetylase</b>                                    | <b>1603</b>                       | <b>4.30</b> | <b>18</b>       |           |
| <b>AckA</b> |             | <b>Acetate kinase</b>                                          | <b>333</b>                        | <b>0.78</b> | <b>6</b>        |           |

|          |             |                                                      |            |             |          |
|----------|-------------|------------------------------------------------------|------------|-------------|----------|
|          | FliC        | Flagellin                                            | 261        | 0.32        | 4        |
|          | CysK        | Cysteine synthase A                                  | 241        | 0.86        | 6        |
|          | PckA        | Phosphoenolpyruvate carboxykinase                    | 211        | 0.27        | 4        |
|          | GrpE        | Heat shock protein                                   | 199        | 0.91        | 4        |
|          | WrbA        | Predicted flavoprotein in Trp regulation             | 143        | 0.66        | 3        |
|          | AhpC        | Alkyl hydroperoxide reductase C22 subunit            | 137        | 0.66        | 4        |
|          | AspC        | Aspartate transaminase                               | 119        | 0.63        | 9        |
| <b>5</b> | AdhC        | Alcohol dehydrogenase C                              | 1740       | 5.62        | 18       |
|          | SodB        | Superoxide dismutase, iron                           | 1462       | 3.43        | 6        |
|          | PckA        | Phosphoenolpyruvate carboxykinase                    | 1271       | 2.34        | 17       |
|          | Gor         | Glutathione–disulfide reductase                      | 1066       | 2.48        | 13       |
|          | Gnd         | Gluconate–6–phosphate dehydrogenase, decarboxylating | 894        | 2.05        | 15       |
|          | HdhA        | 7 alpha–hydroxysteroid dehydrogenase                 | 840        | 6.21        | 11       |
|          | WrbA        | Predicted flavoprotein in Trp regulation             | 781        | 5.40        | 10       |
|          | <b>YcdX</b> | <b>Predicted zinc–binding hydrolase</b>              | <b>610</b> | <b>2.26</b> | <b>8</b> |
|          | <b>AckA</b> | <b>Acetate kinase</b>                                | <b>514</b> | <b>0.93</b> | <b>6</b> |
|          | OsmC        | Protein C, osmotically inducible                     | 481        | 2.94        | 4        |
|          | GadB        | Glutamate decarboxylase isozyme                      | 333        | 0.50        | 6        |
|          | CysK        | Cysteine synthase A                                  | 277        | 0.68        | 5        |
|          | PotD        | Spermidine/putrescine–binding protein precursor      | 248        | 0.59        | 5        |
|          | YchN        | Conserved protein                                    | 234        | 1.94        | 4        |
|          | GpmA        | Phosphoglyceromutase 1                               | 203        | 0.65        | 4        |
|          | <b>PepD</b> | <b>X–His dipeptidase</b>                             | <b>159</b> | <b>0.23</b> | <b>3</b> |
|          | PmbA        | Protease involved in Microcin B17 maturation         | 133        | 0.34        | 3        |
|          | IpxD        | Hypothetical protein b0177                           | 125        | 0.13        | 3        |
|          | SspA        | Stringent starvation protein                         | 121        | 0.34        | 2        |
|          | MoaB        | Molybdopterin biosynthesis, protein B                | 120        | 0.75        | 3        |
|          | <b>DnaK</b> | <b>Molecular chaperone DnaK</b>                      | <b>109</b> | <b>0.11</b> | <b>2</b> |
|          | Icd         | Isocitrate dehydrogenase (NADP)                      | 106        | 0.26        | 3        |
|          | YDJA        | Putative NAD(P)H nitroreductase ydjA                 | 106        | 0.69        | 3        |
|          | Rne         | Ribonuclease E                                       | 89         | 0.06        | 2        |
| <b>6</b> | SpeE        | Spermidine synthase                                  | 947        | 1.40        | 6        |
|          | SodB        | Superoxide dismutase, iron                           | 632        | 0.94        | 4        |
|          | <b>Tsf</b>  | <b>Translation elongation factor EF–Ts</b>           | <b>547</b> | <b>2.21</b> | <b>9</b> |
|          | GloB        | Probable hydroxyacylglutathione hydrolase            | 512        | 2.45        | 9        |
|          | Bfr         | Bacterioferritin                                     | 428        | 2.76        | 6        |
|          | RutE        | Predicted nitroreductase                             | 343        | 1.81        | 7        |
|          | MdaB        | Modulator of drug activity B                         | 293        | 1.63        | 5        |
|          | FklB        | Predicted hydrolase                                  | 263        | 1.21        | 5        |
|          | YgfK        | Putative oxidoreductase Fe–S subunit                 | 260        | 0.20        | 6        |
|          | MtlD        | Mannitol–1–phosphate 5–dehydrogenase                 | 246        | 0.55        | 4        |
|          | YjgF        | Predicted hydrolase                                  | 234        | 1.75        | 3        |
|          | <b>GldA</b> | <b>Glycerol dehydrogenase</b>                        | <b>227</b> | <b>0.58</b> | <b>5</b> |
|          | YchN        | Conserved protein                                    | 187        | 0.71        | 2        |
|          | YjbJ        | Hypothetical protein ECs5028                         | 178        | 2.32        | 3        |
|          | YieF        | Hypothetical protein b3713                           | 162        | 0.99        | 3        |
|          | YiiM        | Predicted hydrolase                                  | 144        | 0.32        | 2        |
|          | GlnB        | Nitrogen regulatory protein P–II.1                   | 143        | 1.29        | 3        |
|          | YbjW        | Hydroxylamine reductase                              | 138        | 0.19        | 3        |
|          | RplL        | Ribosomal protein L7/L12                             | 138        | 0.16        | 2        |
|          | MogA        | Molybdopterin biosynthesis protein mog               | 110        | 0.39        | 2        |
|          | OsmC        | Protein C, osmotically inducible                     | 110        | 0.58        | 2        |
|          | TdcF        | Predicted hydrolase                                  | 106        | 0.63        | 2        |
|          | DeoB        | Phosphopentomutase                                   | 88         | 0.17        | 2        |
|          | AhpC        | Alkyl hydroperoxide reductase C22 subunit            | 84         | 0.40        | 2        |
|          | NemA        | Probable N–ethylmaleimide reductase                  | 77         | 0.20        | 2        |
|          | HtpG        | Heat shock protein C62.5                             | 71         | 0.11        | 2        |
|          | AcpD        | [acyl–carrier–protein] phosphodiesterase             | 70         | 0.39        | 2        |
|          | YcjY        | Conserved hypothetical protein b1327                 | 63         | 0.23        | 2        |

|      |                              |                                                      |             |             |           |
|------|------------------------------|------------------------------------------------------|-------------|-------------|-----------|
| 7    | <b>FbaA</b>                  | <b>Fructose-bisphosphate aldolase II</b>             | <b>2154</b> | <b>4.63</b> | <b>16</b> |
|      | <b>HchA</b>                  | <b>H-NS-repressed protein, 30K</b>                   | <b>1372</b> | <b>7.71</b> | <b>13</b> |
|      | <b>YgeY</b>                  | <b>Probable deacetylase</b>                          | <b>1234</b> | <b>4.73</b> | <b>17</b> |
|      | HtpG                         | Heat shock protein C62.5                             | 763         | 0.93        | 15        |
|      | <b>Tsf</b>                   | <b>Translation elongation factor EF-Ts</b>           | <b>639</b>  | <b>4.13</b> | <b>14</b> |
|      | OsmC                         | Protein C, osmotically inducible                     | 492         | 8.81        | 8         |
|      | WrbA                         | Predicted flavoprotein in Trp regulation             | 342         | 1.75        | 6         |
|      | SspA                         | Stringent starvation protein                         | 305         | 1.40        | 6         |
|      | YjgF                         | Predicted hydrolase                                  | 303         | 1.14        | 3         |
|      | Bfr                          | Bacterioferritin                                     | 274         | 1.13        | 3         |
|      | TreC                         | Alpha,alpha-phosphotrehalase                         | 271         | 0.66        | 10        |
|      | SerC                         | Phosphoserine transaminase                           | 245         | 0.71        | 7         |
|      | YbiB                         | Predicted transferase/phosphorylase                  | 231         | 0.66        | 5         |
|      | AhpF                         | Alkyl hydroperoxide reductase subunit F              | 228         | 0.38        | 5         |
|      | PdxK                         | Pyridoxal kinase                                     | 221         | 0.58        | 4         |
|      | SpeE                         | Spermidine synthase                                  | 217         | 0.55        | 3         |
|      | PepE                         | Peptidase E                                          | 203         | 1.05        | 5         |
|      | TpiA                         | Triose-phosphate isomerase                           | 185         | 0.48        | 3         |
|      | HdhA                         | 7 alpha-hydroxysteroid dehydrogenase                 | 184         | 0.69        | 3         |
|      | RpiA                         | Ribosephosphate isomerase                            | 163         | 0.59        | 3         |
|      | CysK                         | Cysteine synthase A                                  | 156         | 0.23        | 2         |
|      | RbsK                         | Ribokinase                                           | 150         | 0.39        | 5         |
|      | SodB                         | Superoxide dismutase, iron                           | 142         | 0.64        | 4         |
|      | <b>AlaS</b>                  | <b>Alanine-tRNA ligase</b>                           | <b>137</b>  | <b>0.08</b> | <b>2</b>  |
|      | OmpX                         | Outer membrane protein X                             | 135         | 0.76        | 3         |
|      | AhpC                         | Alkyl hydroperoxide reductase C22 subunit            | 126         | 0.66        | 4         |
|      | NfsA                         | Drug activity modulator A                            | 104         | 0.30        | 2         |
|      | GshA                         | Glutamate-cysteine ligase                            | 97          | 0.28        | 4         |
|      | <b>YahK</b>                  | <b>Probable alcohol dehydrogenase (NADP)</b>         | <b>82</b>   | <b>0.20</b> | <b>2</b>  |
|      | ClpB                         | Endopeptidase Clp, ATP-binding chain clpB            | 81          | 0.08        | 3         |
|      | Rpe                          | D-ribulose-5-phosphate 3-epimerase                   | 66          | 0.33        | 3         |
| ZapB | Hypothetical protein ECs4853 | 63                                                   | 0.42        | 2           |           |
| 8    | <b>FbaA</b>                  | <b>Fructose-bisphosphate aldolase II</b>             | <b>3930</b> | <b>8.72</b> | <b>19</b> |
|      | <b>YgeY</b>                  | <b>Probable deacetylase</b>                          | <b>1886</b> | <b>6.27</b> | <b>20</b> |
|      | HtpG                         | Heat shock protein C62.5                             | 728         | 1.03        | 13        |
|      | <b>HchA</b>                  | <b>H-NS-repressed protein, 30K</b>                   | <b>591</b>  | <b>1.79</b> | <b>7</b>  |
|      | <b>ManA</b>                  | <b>Mannose-6-phosphate isomerase</b>                 | <b>529</b>  | <b>0.65</b> | <b>5</b>  |
|      | YbiB                         | Predicted transferase/phosphorylase                  | 490         | 1.25        | 7         |
|      | <b>Def</b>                   | <b>Peptide deformylase</b>                           | <b>416</b>  | <b>1.96</b> | <b>6</b>  |
|      | WrbA                         | Predicted flavoprotein in Trp regulation             | 402         | 2.26        | 6         |
|      | PepE                         | Peptidase E                                          | 383         | 1.74        | 6         |
|      | FabF                         | 3-oxoacyl-[acyl-carrier-protein] synthase II         | 382         | 0.65        | 6         |
|      | TrxB                         | Thioredoxin-disulfide reductase                      | 355         | 0.85        | 6         |
|      | SerC                         | Phosphoserine transaminase                           | 321         | 0.57        | 5         |
|      | CysK                         | Cysteine synthase A                                  | 312         | 0.51        | 4         |
|      | AhpC                         | Alkyl hydroperoxide reductase C22 subunit            | 289         | 1.75        | 5         |
|      | YfiD                         | Probable glycyl radical protein yfiD                 | 274         | 3.27        | 6         |
|      | <b>Tsf</b>                   | <b>Translation elongation factor EF-Ts</b>           | <b>261</b>  | <b>0.42</b> | <b>3</b>  |
|      | Gor                          | Glutathione-disulfide reductase                      | 248         | 0.25        | 3         |
|      | <b>YdgS</b>                  | <b>Probable pyridoxal kinase</b>                     | <b>235</b>  | <b>0.40</b> | <b>3</b>  |
|      | OsmC                         | Protein C, osmotically inducible                     | 232         | 0.98        | 2         |
|      | NfsA                         | Drug activity modulator A                            | 196         | 0.30        | 2         |
|      | Gnd                          | Gluconate-6-phosphate dehydrogenase, decarboxylating | 194         | 0.23        | 3         |
|      | HdhA                         | 7 alpha-hydroxysteroid dehydrogenase                 | 173         | 0.30        | 2         |
|      | YghU                         | Predicted hydrolase                                  | 169         | 0.55        | 4         |
|      | <b>YahK</b>                  | <b>Probable alcohol dehydrogenase (NADP)</b>         | <b>153</b>  | <b>0.20</b> | <b>2</b>  |
|      | GcvT                         | Aminomethyltransferase                               | 150         | 0.20        | 2         |
|      | Hns                          | DNA-binding protein H-NS                             | 130         | 0.56        | 2         |
|      | YciD                         | YciD protein precursor                               | 95          | 0.36        | 3         |

|           |             |                                                                |             |              |           |
|-----------|-------------|----------------------------------------------------------------|-------------|--------------|-----------|
|           | KdsC        | 3-deoxy-D-manno-octulosonate 8-phosphate phosphatase           | 93          | 0.42         | 2         |
|           | TreC        | Alpha, alpha-phosphotrehalase                                  | 81          | 0.06         | 2         |
|           | SodB        | Superoxide dismutase, iron                                     | 80          | 0.18         | 2         |
| <b>9</b>  | <b>FbaA</b> | <b>Fructose-bisphosphate aldolase II</b>                       | <b>540</b>  | <b>1.07</b>  | <b>8</b>  |
|           | <b>MsrB</b> | <b>Hypothetical protein b1778</b>                              | <b>291</b>  | <b>2.76</b>  | <b>6</b>  |
|           | <b>YgeY</b> | <b>Probable deacetylase</b>                                    | <b>117</b>  | <b>0.17</b>  | <b>2</b>  |
|           | SodB        | Superoxide dismutase, iron                                     | 104         | 0.39         | 2         |
|           | DeoD        | Purine-nucleoside phosphorylase                                | 94          | 0.31         | 2         |
| <b>10</b> | <b>Tsf</b>  | <b>Translation elongation factor EF-Ts</b>                     | <b>3117</b> | <b>13.67</b> | <b>18</b> |
|           | Gnd         | Gluconate-6-phosphate dehydrogenase, decarboxylating           | 1782        | 6.57         | 25        |
|           | DeoC        | Deoxyribose-phosphate aldolase                                 | 1212        | 8.86         | 17        |
|           | WrbA        | Predicted flavoprotein in Trp regulation                       | 1155        | 9.62         | 12        |
|           | Gor         | Glutathione-disulfide reductase                                | 1150        | 2.48         | 13        |
|           | HtpG        | Heat shock protein C62.5                                       | 725         | 1.14         | 15        |
|           | HdhA        | 7 alpha-hydroxysteroid dehydrogenase                           | 663         | 3.86         | 11        |
|           | GmhA        | Phosphoheptose isomerase                                       | 606         | 5.34         | 10        |
|           | YbiB        | Predicted transferase/phosphorylase                            | 599         | 2.73         | 11        |
|           | PmbA        | Protease involved in Microcin B17 maturation                   | 580         | 1.26         | 11        |
|           | <b>YgeY</b> | <b>Probable deacetylase</b>                                    | <b>546</b>  | <b>0.89</b>  | <b>8</b>  |
|           | CysK        | Cysteine synthase A                                            | 541         | 1.29         | 8         |
|           | TldD        | Protease involved in Microcin B17 maturation                   | 541         | 0.75         | 8         |
|           | YqjG        | Hypothetical 37.4 kD protein in exuR-tdcC intergenic region    | 453         | 0.77         | 6         |
|           | <b>FbaA</b> | <b>Fructose-bisphosphate aldolase II</b>                       | <b>429</b>  | <b>1.07</b>  | <b>7</b>  |
|           | <b>Ppa</b>  | <b>Inorganic diphosphatase</b>                                 | <b>417</b>  | <b>3.96</b>  | <b>8</b>  |
|           | TreC        | Alpha, alpha-phosphotrehalase                                  | 350         | 0.57         | 8         |
|           | YdhF        | Predicted hydrolase                                            | 350         | 1.33         | 7         |
|           | GadB        | Glutamate decarboxylase isozyme                                | 331         | 0.40         | 5         |
|           | YghU        | Predicted hydrolase                                            | 305         | 0.73         | 4         |
|           | NfsA        | Drug activity modulator A                                      | 305         | 0.69         | 4         |
|           | PckA        | Phosphoenolpyruvate carboxykinase                              | 302         | 0.44         | 6         |
|           | SodB        | Superoxide dismutase, iron                                     | 284         | 1.29         | 5         |
|           | <b>DnaK</b> | <b>Molecular chaperone DnaK</b>                                | <b>277</b>  | <b>0.23</b>  | <b>4</b>  |
|           | YgeW        | Hypothetical protein ygeW                                      | 251         | 0.62         | 6         |
|           | YajF        | Fructokinase                                                   | 246         | 0.54         | 4         |
|           | <b>HchA</b> | <b>H-NS-repressed protein, 30K</b>                             | <b>244</b>  | <b>0.41</b>  | <b>3</b>  |
|           | Asd         | Aspartate-semialdehyde dehydrogenase                           | 240         | 0.43         | 4         |
|           | TpiA        | Triose-phosphate isomerase                                     | 235         | 0.30         | 2         |
|           | <b>YadF</b> | <b>Carbonic anhydrase 2</b>                                    | <b>221</b>  | <b>0.75</b>  | <b>3</b>  |
|           | KdsC        | 3-deoxy-D-manno-octulosonate 8-phosphate phosphatase           | 218         | 1.01         | 4         |
|           | YggS        | Hypothetical protein b2951                                     | 218         | 0.51         | 3         |
|           | GlpQ        | Glycerophosphodiester phosphodiesterase precursor, periplasmic | 216         | 0.28         | 2         |
|           | DapB        | Dihydrodipicolinate reductase                                  | 208         | 0.28         | 2         |
|           | EutL        | Hypothetical protein b2439                                     | 207         | 0.59         | 3         |
|           | DeoD        | Purine-nucleoside phosphorylase                                | 206         | 0.72         | 4         |
|           | YbeK        | Purine nucleosidase-related protein ybeK                       | 195         | 0.52         | 3         |
|           | GshA        | Glutamate-cysteine ligase                                      | 194         | 0.20         | 3         |
|           | <b>AckA</b> | <b>Acetate kinase</b>                                          | <b>176</b>  | <b>0.28</b>  | <b>3</b>  |
|           | <b>YncB</b> | <b>Putative NADP-dependent oxidoreductase yncB</b>             | <b>172</b>  | <b>0.33</b>  | <b>3</b>  |
|           | BglA        | 6-phospho-beta-glucosidase                                     | 165         | 0.29         | 4         |
|           | <b>ZraP</b> | <b>Zinc resistance-associated protein</b>                      | <b>160</b>  | <b>0.98</b>  | <b>2</b>  |
|           | YjhH        | Uncharacterized protein                                        | 159         | 0.39         | 3         |
|           | MoaB        | Molybdopterin biosynthesis, protein B                          | 149         | 0.75         | 3         |
|           | MgsA        | Methylglyoxal synthase                                         | 125         | 0.51         | 2         |
|           | SspA        | Stringent starvation protein                                   | 124         | 0.34         | 2         |
|           | GpmA        | Phosphoglyceromutase 1                                         | 120         | 0.45         | 3         |
|           | HemF        | Coproporphyrinogen oxidase III                                 | 116         | 0.36         | 3         |
|           | GuaA        | GMP synthase (glutamine-hydrolyzing)                           | 99          | 0.13         | 2         |
|           | YjgF        | Predicted hydrolase                                            | 94          | 0.66         | 2         |

|           |             |                                                                                    |             |              |           |
|-----------|-------------|------------------------------------------------------------------------------------|-------------|--------------|-----------|
|           | Mdh         | Malate dehydrogenase                                                               | 93          | 0.25         | 2         |
|           | <b>Def</b>  | <b>Peptide deformylase</b>                                                         | <b>92</b>   | <b>0.44</b>  | <b>2</b>  |
|           | <b>DapE</b> | <b>Succinyl–diaminopimelate desuccinylase</b>                                      | <b>92</b>   | <b>0.19</b>  | <b>2</b>  |
|           | RplL        | Ribosomal protein L7/L12                                                           | 79          | 0.75         | 2         |
| <b>11</b> | <b>Tsf</b>  | <b>Elongation factor Ts</b>                                                        | <b>3889</b> | <b>22.40</b> | <b>19</b> |
|           | DeoD        | Purine nucleoside phosphorylase                                                    | 1932        | 37.77        | 24        |
|           | GadB        | Glutamate decarboxylase isozyme                                                    | 1643        | 2.63         | 13        |
|           | YgeW        | ornithine carbamoyltransferase                                                     | 1548        | 4.45         | 18        |
|           | BglA        | 6–phospho–beta–glucosidase A                                                       | 1104        | 1.99         | 15        |
|           | HtpG        | Heat shock protein 90                                                              | 905         | 1.25         | 16        |
|           | <b>Dcp</b>  | <b>Dipeptidyl carboxypeptidase II</b>                                              | <b>889</b>  | <b>0.75</b>  | <b>11</b> |
|           | GuaA        | GMP synthetase (glutamine aminotransferase)                                        | 882         | 1.35         | 13        |
|           | <b>DnaK</b> | <b>Molecular chaperone DnaK</b>                                                    | <b>766</b>  | <b>0.78</b>  | <b>10</b> |
|           | Gnd         | Gluconate–6–phosphate dehydrogenase, decarboxylating                               | 727         | 0.87         | 8         |
|           | DapA        | Dihydrodipicolinate synthase                                                       | 685         | 2.47         | 8         |
|           | Ybgl        | Hypothetical protein Z0861                                                         | 624         | 1.20         | 5         |
|           | <b>YadF</b> | <b>Carbonic anhydrase</b>                                                          | <b>621</b>  | <b>4.33</b>  | <b>10</b> |
|           | LdhA        | Fermentative D–lactate dehydrogenase, NAD–dependent                                | 529         | 0.79         | 6         |
|           | SpeB        | Agmatinase                                                                         | 410         | 1.10         | 6         |
|           | Pgi         | Glucose–6–phosphate isomerase                                                      | 363         | 0.34         | 5         |
|           | WrbA        | Predicted flavoprotein in Trp regulation                                           | 354         | 1.33         | 5         |
|           | AcnB        | Bifunctional aconitate hydratase 2/2–methylisocitrate dehydratase                  | 337         | 0.31         | 7         |
|           | YhhX        | Predicted oxidoreductase with NAD(P)–binding Rossmann–fold domain                  | 333         | 0.58         | 5         |
|           | <b>UxaC</b> | <b>Uronate isomerase</b>                                                           | <b>328</b>  | <b>0.59</b>  | <b>7</b>  |
|           | LeuS        | Leucyl–tRNA synthetase                                                             | 326         | 0.25         | 5         |
|           | <b>YgeY</b> | <b>Probable deacetylase</b>                                                        | <b>291</b>  | <b>0.37</b>  | <b>4</b>  |
|           | DeoC        | 2–deoxyribose–5–phosphate aldolase, NAD(P)–linked                                  | 276         | 0.66         | 4         |
|           | <b>ZraP</b> | <b>Zinc resistance–associated protein</b>                                          | <b>250</b>  | <b>1.49</b>  | <b>3</b>  |
|           | Tig         | Trigger factor                                                                     | 243         | 0.35         | 4         |
|           | YbiB        | Predicted transferase/phosphorylase                                                | 235         | 0.66         | 5         |
|           | Moab        | Molybdopterin biosynthesis, protein B                                              | 226         | 1.11         | 4         |
|           | Eda         | Keto–hydroxyglutarate–aldolase/keto–deoxy–phosphogluconate aldolase                | 207         | 0.88         | 3         |
|           | PotD        | Polyamine transporter subunit                                                      | 201         | 0.59         | 5         |
|           | RbsD        | D–ribose pyranase                                                                  | 199         | 0.36         | 3         |
|           | PurH        | Fused IMP cyclohydrolase/phosphoribosylaminoimidazolecarboxamide formyltransferase | 180         | 0.28         | 4         |
|           | NadE        | NAD synthetase, NH <sub>3</sub> /glutamine–dependent                               | 177         | 0.42         | 3         |
|           | GroES       | Co–chaperonin GroES                                                                | 176         | 2.67         | 3         |
|           | RplL        | 50S Ribosomal protein L7/L12                                                       | 158         | 1.31         | 3         |
|           | <b>YqhD</b> | <b>Alcohol dehydrogenase, NAD(P)–dependent</b>                                     | <b>144</b>  | <b>0.29</b>  | <b>3</b>  |
|           | PfkA        | 6–phosphofructokinase                                                              | 141         | 0.50         | 4         |
|           | Tuf         | Elongation factor Tu                                                               | 140         | 0.18         | 2         |
|           | NanA        | N–acetylneuraminase lyase                                                          | 132         | 0.24         | 2         |
|           | OmpW        | Outer membrane protein W                                                           | 125         | 0.36         | 2         |
|           | LysS        | Lysyl–tRNA synthetase                                                              | 120         | 0.21         | 3         |
|           | Asd         | Aspartate–semialdehyde dehydrogenase                                               | 120         | 0.20         | 2         |
|           | GmhA        | Phosphoheptose isomerase                                                           | 119         | 0.40         | 2         |
|           | GldA        | Glycerol dehydrogenase                                                             | 118         | 0.20         | 2         |
|           | <b>FbaA</b> | <b>Fructose–biphosphate aldolase II</b>                                            | <b>99</b>   | <b>0.20</b>  | <b>2</b>  |
|           | MetK        | S–adenosylmethionine synthetase                                                    | 84          | 0.19         | 2         |
|           | YhfA        | Hypothetical protein Z4717                                                         | 76          | 0.61         | 2         |
|           | <b>Ppa</b>  | <b>Inorganic pyrophosphatase</b>                                                   | <b>74</b>   | <b>0.43</b>  | <b>2</b>  |
|           | PflB        | Pyruvate formate lyase I                                                           | 73          | 0.09         | 2         |
| <b>12</b> | <b>DnaK</b> | <b>DnaK–typeMolecular chaperone DnaK</b>                                           | <b>2395</b> | <b>3.80</b>  | <b>27</b> |
|           | GadB        | Glutamate decarboxylase isozyme                                                    | 1371        | 2.39         | 14        |



|             |                                                              |                                                                       |             |             |           |
|-------------|--------------------------------------------------------------|-----------------------------------------------------------------------|-------------|-------------|-----------|
| Pgi         | Glucose-6-phosphate isomerase                                | 1309                                                                  | 2.23        | 18          |           |
| LeuS        | Leucine-tRNA ligase                                          | 1104                                                                  | 1.10        | 19          |           |
| PflB        | Formate C-acetyltransferase 1                                | 967                                                                   | 1.14        | 15          |           |
| SerS        | Serine-tRNA ligase                                           | 939                                                                   | 1.82        | 13          |           |
| <b>TktA</b> | <b>Transketolase 1, thiamin-binding</b>                      | <b>772</b>                                                            | <b>0.82</b> | <b>12</b>   |           |
| YgeW        | Hypothetical protein ygeW                                    | 708                                                                   | 1.43        | 11          |           |
| AtoB        | Acetyl-CoA C-acetyltransferase                               | 686                                                                   | 1.64        | 9           |           |
| FusA        | Translation elongation factor EF-G                           | 677                                                                   | 0.45        | 7           |           |
| PurH        | PurH bifunctional enzyme                                     | 660                                                                   | 0.76        | 9           |           |
| GshB        | Glutathione synthase                                         | 557                                                                   | 1.46        | 8           |           |
| TnaA        | Tryptophanase                                                | 521                                                                   | 1.11        | 11          |           |
| Tig         | Trigger factor                                               | 520                                                                   | 0.96        | 9           |           |
| RplL        | Ribosomal protein L7/L12                                     | 510                                                                   | 2.05        | 3           |           |
| HtpG        | Heat shock protein C62.5                                     | 509                                                                   | 0.84        | 11          |           |
| LysU        | Lysine-tRNA ligase thermoinducible                           | 491                                                                   | 0.99        | 10          |           |
| GrpE        | Heat shock protein                                           | 447                                                                   | 1.65        | 5           |           |
| Rpe         | D-ribulose-5-phosphate 3-epimerase                           | 446                                                                   | 1.37        | 5           |           |
| ArgH        | Argininosuccinate lyase                                      | 435                                                                   | 0.64        | 7           |           |
| BglA        | 6-phospho-beta-glucosidase                                   | 407                                                                   | 0.67        | 8           |           |
| <b>Tsf</b>  | <b>Translation elongation factor EF-Ts</b>                   | <b>382</b>                                                            | <b>1.26</b> | <b>7</b>    |           |
| ValS        | Valine-tRNA ligase                                           | 373                                                                   | 0.35        | 9           |           |
| AldA        | Lactaldehyde dehydrogenase                                   | 364                                                                   | 0.73        | 8           |           |
| GroES       | Chaperonin groES                                             | 315                                                                   | 4.08        | 4           |           |
| <b>YqhD</b> | <b>Alcohol dehydrogenase, NAD(P)-dependent</b>               | <b>303</b>                                                            | <b>0.67</b> | <b>5</b>    |           |
| PepP        | X-Pro aminopeptidase II                                      | 295                                                                   | 0.43        | 4           |           |
| AspA        | Aspartate ammonia-lyase                                      | 286                                                                   | 0.61        | 7           |           |
| FabA        | 3-hydroxydecanoyl-[acyl-carrier-protein] dehydratase         | 229                                                                   | 1.51        | 5           |           |
| GlcG        | Protein glcG                                                 | 222                                                                   | 1.12        | 2           |           |
| KdgA        | 2-dehydro-3-deoxy-phosphogluconate aldolase                  | 217                                                                   | 0.88        | 4           |           |
| <b>TktB</b> | <b>Transketolase 2, thiamin-binding</b>                      | <b>215</b>                                                            | <b>0.22</b> | <b>4</b>    |           |
| RbsD        | Hypothetical protein ECs4690                                 | 214                                                                   | 0.57        | 2           |           |
| Gnd         | Gluconate-6-phosphate dehydrogenase, decarboxylating         | 216                                                                   | 0.32        | 4           |           |
| <b>Dcp</b>  | <b>Peptidyl-dipeptidase Dcp</b>                              | <b>209</b>                                                            | <b>0.15</b> | <b>3</b>    |           |
| Agp         | Glucose-1-phosphatase precursor                              | 190                                                                   | 0.26        | 3           |           |
| <b>YgeY</b> | <b>Probable deacetylase</b>                                  | <b>187</b>                                                            | <b>0.27</b> | <b>3</b>    |           |
| YfiD        | Probable glycyl radical protein yfiD                         | 186                                                                   | 2.35        | 5           |           |
| WrbA        | Predicted flavoprotein in Trp regulation                     | 180                                                                   | 0.40        | 2           |           |
| DeoD        | Purine-nucleoside phosphorylase                              | 164                                                                   | 0.50        | 3           |           |
| YlbA        | Hypothetical protein b0515                                   | 154                                                                   | 0.28        | 2           |           |
| TufB        | Translation elongation factor EF-Tu.B                        | 154                                                                   | 0.28        | 3           |           |
| AceA        | Isocitrate lyase                                             | 151                                                                   | 0.25        | 3           |           |
| Asd         | Aspartate-semialdehyde dehydrogenase                         | 149                                                                   | 0.20        | 2           |           |
| SpeB        | Agmatinase                                                   | 147                                                                   | 0.24        | 2           |           |
| <b>IleS</b> | <b>Isoleucine-tRNA ligase</b>                                | <b>139</b>                                                            | <b>0.15</b> | <b>4</b>    |           |
| GapA        | Glyceraldehyde-3-phosphate dehydrogenase (phosphorylating) A | 131                                                                   | 0.35        | 3           |           |
| YbiB        | Predicted transferase/phosphorylase                          | 123                                                                   | 0.36        | 3           |           |
| Moab        | Molybdopterin biosynthesis, protein B                        | 110                                                                   | 0.45        | 2           |           |
| <b>YjgB</b> | <b>Predicted hydrolase</b>                                   | <b>103</b>                                                            | <b>0.21</b> | <b>2</b>    |           |
| DapA        | Dihydrodipicolinate synthase                                 | 83                                                                    | 0.25        | 2           |           |
| GlcB        | Malate synthase isoenzyme G                                  | 76                                                                    | 0.09        | 2           |           |
| TdcE        | Keto acid formate-lyase                                      | 67                                                                    | 0.13        | 2           |           |
| <b>13</b>   | <b>GlcB</b>                                                  | <b>Malate synthase G</b>                                              | <b>2012</b> | <b>4.25</b> | <b>32</b> |
|             | <b>Agp</b>                                                   | <b>Glucose-1-phosphatase/inositol phosphatase</b>                     | <b>1585</b> | <b>9.46</b> | <b>24</b> |
|             | <b>FliY</b>                                                  | <b>Cystine transporter subunit</b>                                    | <b>649</b>  | <b>3.94</b> | <b>13</b> |
|             | <b>MglB</b>                                                  | <b>Methyl-galactoside transporter subunit</b>                         | <b>630</b>  | <b>2.32</b> | <b>11</b> |
|             | <b>DapD</b>                                                  | <b>2,3,4,5-tetrahydropyridine-2-carboxylate N-succinyltransferase</b> | <b>525</b>  | <b>1.90</b> | <b>9</b>  |
|             | <b>ClpB</b>                                                  | <b>Protein disaggregation chaperone</b>                               | <b>500</b>  | <b>0.46</b> | <b>9</b>  |
|             | <b>ZraP</b>                                                  | <b>Zinc resistance-associated protein</b>                             | <b>310</b>  | <b>2.94</b> | <b>4</b>  |
|             | <b>LysS</b>                                                  | <b>Lysyl-tRNA synthetase</b>                                          | <b>308</b>  | <b>0.65</b> | <b>8</b>  |

|           |             |                                                                                           |            |             |          |
|-----------|-------------|-------------------------------------------------------------------------------------------|------------|-------------|----------|
|           | <b>DnaK</b> | <b>Molecular chaperone DnaK</b>                                                           | <b>307</b> | <b>0.37</b> | <b>6</b> |
|           | YgeW        | Ornithine carbamoyltransferase                                                            | 304        | 0.76        | 7        |
|           | PurH        | Fused IMP<br>cyclohydrolase/phosphoribosylaminoimid<br>azolecarboxamide formyltransferase | 204        | 0.28        | 4        |
|           | <b>YqhD</b> | <b>Alcohol dehydrogenase, NAD(P)-<br/>dependent</b>                                       | <b>176</b> | <b>0.29</b> | <b>3</b> |
|           | Mdh         | Malate dehydrogenase                                                                      | 168        | 0.39        | 3        |
|           | AlnB        | Alanine racemase 2, PLP-binding                                                           | 135        | 0.44        | 4        |
|           | <b>TktA</b> | <b>Transketolase 1, thiamin-binding</b>                                                   | <b>131</b> | <b>0.11</b> | <b>2</b> |
|           | PflB        | Pyruvate formate lyase I                                                                  |            |             |          |
|           | Efp         | Elongation factor P                                                                       | 94         | 0.41        | 2        |
|           | NikA        | Nickel transporter subunit                                                                | 88         | 0.13        | 2        |
|           | Hns         | DNA-binding protein HLP-II (HU, BH2,<br>HD, NS); pleiotropic regulator                    | 82         | 0.56        | 2        |
|           | Eno         | Phosphopyruvate hydratase                                                                 | 71         | 0.17        | 2        |
| <b>14</b> | FumB        | Anaerobic class I fumarate hydratase<br>(fumarase B)                                      | 361        | 0.61        | 8        |
|           | <b>ZraP</b> | <b>Zinc resistance-associated protein</b>                                                 | <b>352</b> | <b>3.95</b> | <b>5</b> |
|           | LysS        | Lysyl-tRNA synthetase                                                                     | 347        | 0.75        | 9        |
|           | Mdh         | Malate dehydrogenase                                                                      | 151        | 0.55        | 4        |
|           | LysS        | Lysine tRNA synthetase, constitutive                                                      | 137        | 0.21        | 3        |
|           | YkgC        | Predicted pyridine nucleotide-disulfide<br>oxidoreductase                                 | 98         | 0.25        | 3        |
|           | ProA        | Gamma-glutamylphosphate reductase                                                         | 92         | 0.17        | 2        |
|           | EbgR        | DNA-binding transcriptional repressor                                                     | 92         | 0.22        | 2        |
|           | DapD        | 2,3,4,5-tetrahydropyridine-2-carboxylate<br>N-succinyltransferase                         | 90         | 0.27        | 2        |
|           | Eno         | Phosphopyruvate hydratase                                                                 | 77         | 0.17        | 2        |
|           | MdoD        | Periplasmic glucan biosynthesis protein                                                   | 76         | 0.12        | 2        |
|           | RbsB        | D-ribose transporter subunit                                                              | 74         | 0.26        | 2        |
|           | ClpB        | Protein disaggregation chaperone                                                          | 72         | 0.08        | 2        |
|           | GlgB        | 1,4-alpha-glucan branching enzyme                                                         | 71         | 0.09        | 2        |
| <b>15</b> | <b>ZraP</b> | <b>Zinc resistance-associated protein</b>                                                 | <b>403</b> | <b>2.94</b> | <b>5</b> |
|           | LysS        | Lysyl-tRNA synthetase                                                                     | 357        | 0.99        | 11       |
|           | YjjV        | Predicted deoxyribonuclease                                                               | 260        | 0.84        | 5        |
|           | <b>RpoA</b> | <b>DNA-directed RNA polymerase alpha<br/>subunit</b>                                      | <b>209</b> | <b>0.63</b> | <b>5</b> |
|           | RbsB        | D-ribose transporter subunit                                                              | 167        | 0.41        | 3        |
|           | GlgB        | 1,4-alpha-glucan branching enzyme                                                         | 162        | 0.19        | 4        |
|           | OmpA        | Outer membrane protein 3a (II*;G;d)                                                       | 152        | 0.33        | 3        |
|           | <b>LpdA</b> | <b>Dihydrolipoamide dehydrogenase</b>                                                     | <b>142</b> | <b>0.24</b> | <b>3</b> |
|           | Mdh         | Malate dehydrogenase                                                                      | 140        | 0.39        | 3        |
|           | PykF        | Pyruvate kinase                                                                           | 88         | 0.15        | 2        |
|           | OsmY        | Periplasmic protein                                                                       | 87         | 0.40        | 2        |
|           | MdoD        | Periplasmic glucan biosynthesis protein                                                   | 69         | 0.12        | 2        |
| <b>16</b> | TalA        | Transaldolase                                                                             | 569        | 3.47        | 14       |
|           | <b>ZraP</b> | <b>Zinc resistance-associated protein</b>                                                 | <b>464</b> | <b>5.22</b> | <b>6</b> |
|           | Mdh         | Malate dehydrogenase                                                                      | 290        | 1.16        | 7        |
|           | MdoD        | Periplasmic glucan biosynthesis protein                                                   | 287        | 0.50        | 7        |
|           | SpoR        | Guanylate kinase                                                                          | 242        | 1.46        | 6        |
|           | RfaD        | ADP-L-glycero-D-mannoheptose-6-<br>epimerase                                              | 159        | 0.67        | 5        |
|           | <b>TktB</b> | <b>Transketolase 2, thiamin-binding</b>                                                   | <b>125</b> | <b>0.16</b> | <b>3</b> |
|           | LysS        | Lysyl-tRNA synthetase                                                                     | 124        | 0.28        | 4        |
|           | PaxA        | 2'-deoxycytidine 5'-triphosphate<br>deaminase                                             | 122        | 0.39        | 2        |
|           | YebB        | Hypothetical protein Fpla041 [Plasmid F]                                                  | 114        | 0.37        | 3        |
|           | YgaU        | Hypothetical protein b2665                                                                | 99         | 0.91        | 3        |
| <b>17</b> | <b>ZraP</b> | <b>Zinc resistance-associated protein</b>                                                 | <b>315</b> | <b>2.94</b> | <b>6</b> |
|           | TalA        | Transaldolase                                                                             | 171        | 0.49        | 4        |
|           | YhbH        | Putative yhbH sigma 54 modulator                                                          | 137        | 1.24        | 3        |
|           | TesB        | Acyl-CoA thioesterase II                                                                  | 126        | 0.40        | 3        |
|           | IspF        | 2-C-methyl-D-erythritol 2,4-<br>cyclodiphosphate synthase                                 | 125        | 0.51        | 2        |

|           |             |                                                                                     |            |             |          |
|-----------|-------------|-------------------------------------------------------------------------------------|------------|-------------|----------|
|           | YgiW        | Hypothetical protein Z4376                                                          | 62         | 0.63        | 2        |
| <b>18</b> | RbsB        | D-ribose transporter subunit                                                        | 332        | 1.24        | 7        |
|           | <b>ZraP</b> | <b>Zinc resistance-associated protein</b>                                           | <b>303</b> | <b>2.13</b> | <b>4</b> |
|           | YaeH        | Putative structural protein                                                         | 133        | 0.99        | 3        |
|           | FabG        | 3-oxoacyl-[acyl-carrier-protein] reductase                                          | 107        | 0.52        | 3        |
|           | GadB        | Glutamate decarboxylase isozyme                                                     | 104        | 0.15        | 2        |
|           | RbfA        | Ribosome-binding factor A                                                           | 83         | 0.58        | 2        |
|           | YgiW        | Hypothetical protein Z4376                                                          | 59         | 0.63        | 2        |
|           | YlaD        | Maltose O-acetyltransferase                                                         | 57         | 0.41        | 2        |
| <b>19</b> | NanA        | N-acetylneuraminatase lyase                                                         | 576        | 2.68        | 10       |
|           | TalB        | Transaldolase                                                                       | 550        | 2.36        | 11       |
|           | GapA        | Glyceraldehyde-3-phosphate dehydrogenase                                            | 357        | 0.49        | 3        |
|           | Agn         | CP4-44 prophage; antigen 43 (Ag43) phase-variable biofilm formation autotransporter | 331        | 0.31        | 7        |
|           | GadB        | Glutamate decarboxylase isozyme                                                     | 326        | 0.84        | 9        |
|           | PckA        | Phosphoenolpyruvate carboxykinase                                                   | 323        | 0.62        | 8        |
|           | DeoD        | Purine nucleoside phosphorylase                                                     | 283        | 1.58        | 7        |
|           | YdgA        | Hypothetical protein b1614                                                          | 225        | 0.49        | 6        |
|           | <b>DnaK</b> | <b>Molecular chaperone DnaK</b>                                                     | <b>211</b> | <b>0.30</b> | <b>5</b> |
|           | Eno         | Phosphopyruvate hydratase                                                           | 202        | 0.48        | 5        |
|           | <b>UxaC</b> | <b>Uronate isomerase</b>                                                            | <b>188</b> | <b>0.30</b> | <b>4</b> |
|           | <b>HisD</b> | <b>Bifunctional histidinol dehydrogenase/histidinol dehydrogenase</b>               | <b>180</b> | <b>0.36</b> | <b>4</b> |
|           | YcaC        | Predicted hydrolase                                                                 | 172        | 0.58        | 3        |
|           | LivK        | high-affinity leucine-specific transport system; periplasmic binding protein        | 160        | 0.44        | 4        |
|           | WrbA        | Predicted flavoprotein in Trp regulation                                            | 133        | 0.66        | 3        |
|           | FliC        | Flagellar filament structural protein (flagellin)                                   | 133        | 0.23        | 3        |
|           | LysS        | Lysyl-tRNA synthetase                                                               | 129        | 0.21        | 3        |
|           | GabT        | 4-aminobutyrate aminotransferase, PLP-dependent                                     | 125        | 0.17        | 2        |
|           | Pgk         | Phosphoglycerate kinase                                                             | 116        | 0.42        | 4        |
|           | Rpe         | Ribulose-phosphate 3-epimerase                                                      | 106        | 0.54        | 3        |
|           | PotD        | Polyamine transporter subunit                                                       | 91         | 0.32        | 3        |
|           | RplL        | 50S Ribosomal protein L7/L12                                                        | 91         | 1.31        | 3        |
|           | DapA        | Dihydrodipicolinate synthase                                                        | 75         | 0.25        | 2        |
|           | FusA        | Elongation factor EF-2                                                              | 56         | 0.10        | 2        |
|           | AhpC        | Alkyl hydroperoxide reductase, C22 subunit; detoxification of hydroperoxides        | 52         | 0.40        | 2        |

The position of spot number is indicated in Fig. S3. This table contains just proteins with number of unique peptides  $\geq 2$ .
